# Supplementary material for: Proteasomal degradation of NOD2 by NLRP12 in monocytes promotes bacterial tolerance and colonization by enteropathogens
Source: PubMed Central journal article supplement (PMC6297353; doi:10.1038/s41467-018-07750-5), 2018-12-17
Supplement: 41467_2018_7750_MOESM1_ESM.pdf [file 41467_2018_7750_MOESM1_ESM.pdf]

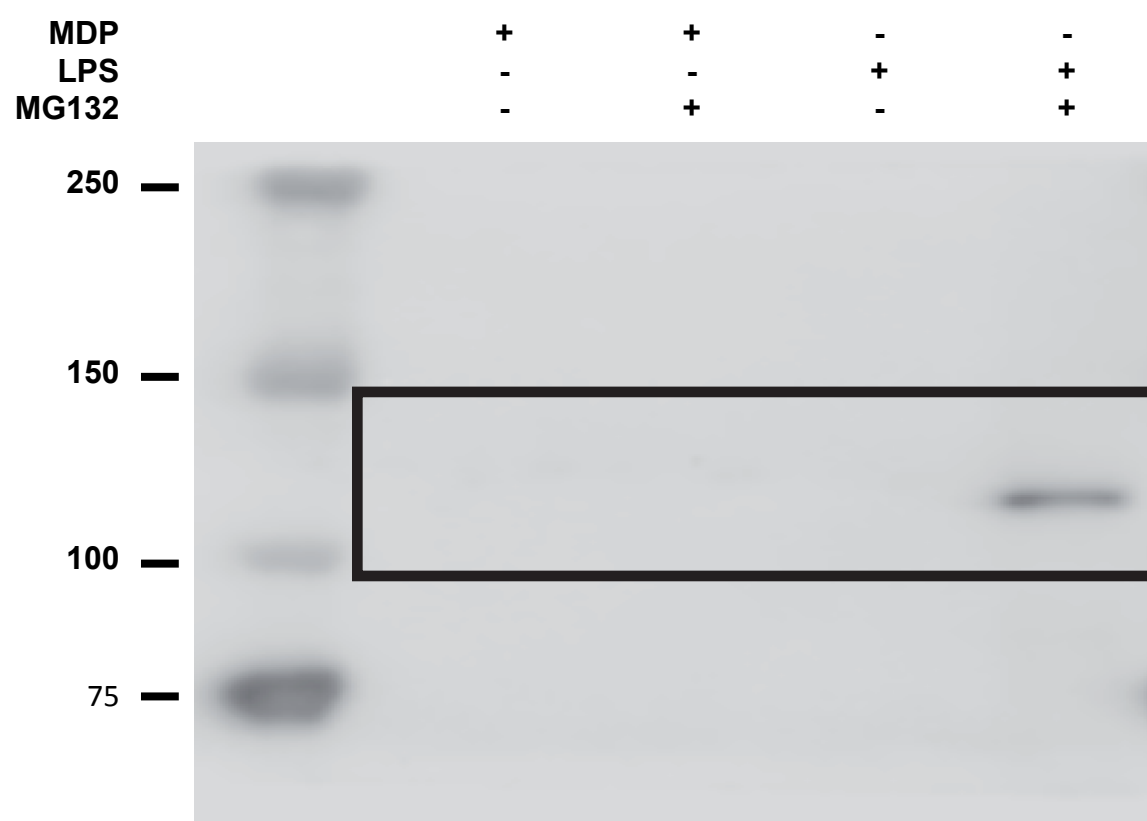

**Supplementary Fig. 1. Complete membrane from Figure 1a (boxed area).** Western blot of Co-IP protein Myc-NOD2. The protein was separated using a SDS-gel and transferred to PVDF membrane. The blot was incubated using an anti-NLRP12 (1:1000) antibody (GeneTex, Inc., USA).

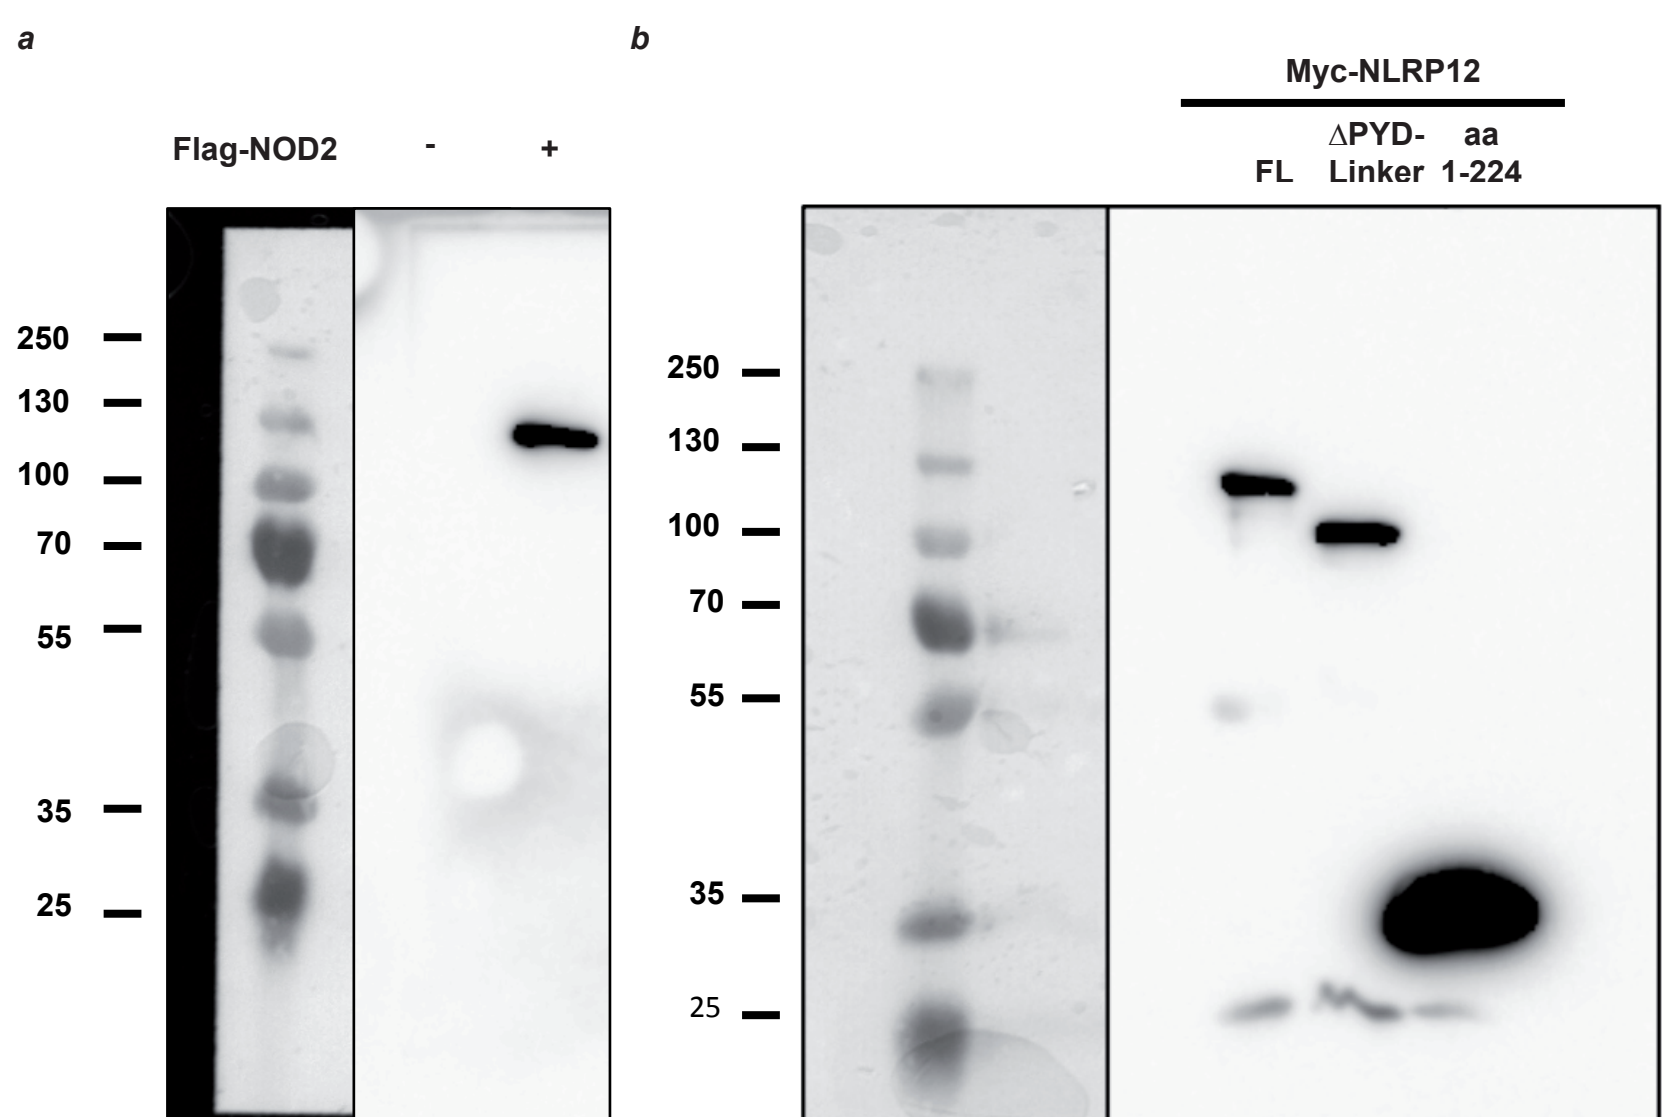

**Supplementary Fig. 2.** Representative Western blot from Figure 1d of **a)** NOD2 full-length and **b)** Myc-NLRP12 full-length (FL) and mutant isoforms. The protein was separated using a SDS-gel and transferred to PVDF membrane. The blot was incubated using a monoclonal anti-FLAG M2 (Stratagene, #200471) (1:2000) or a polyclonal anti-cMyc (Santa Cruz, sc-789) (1:1000) respectively

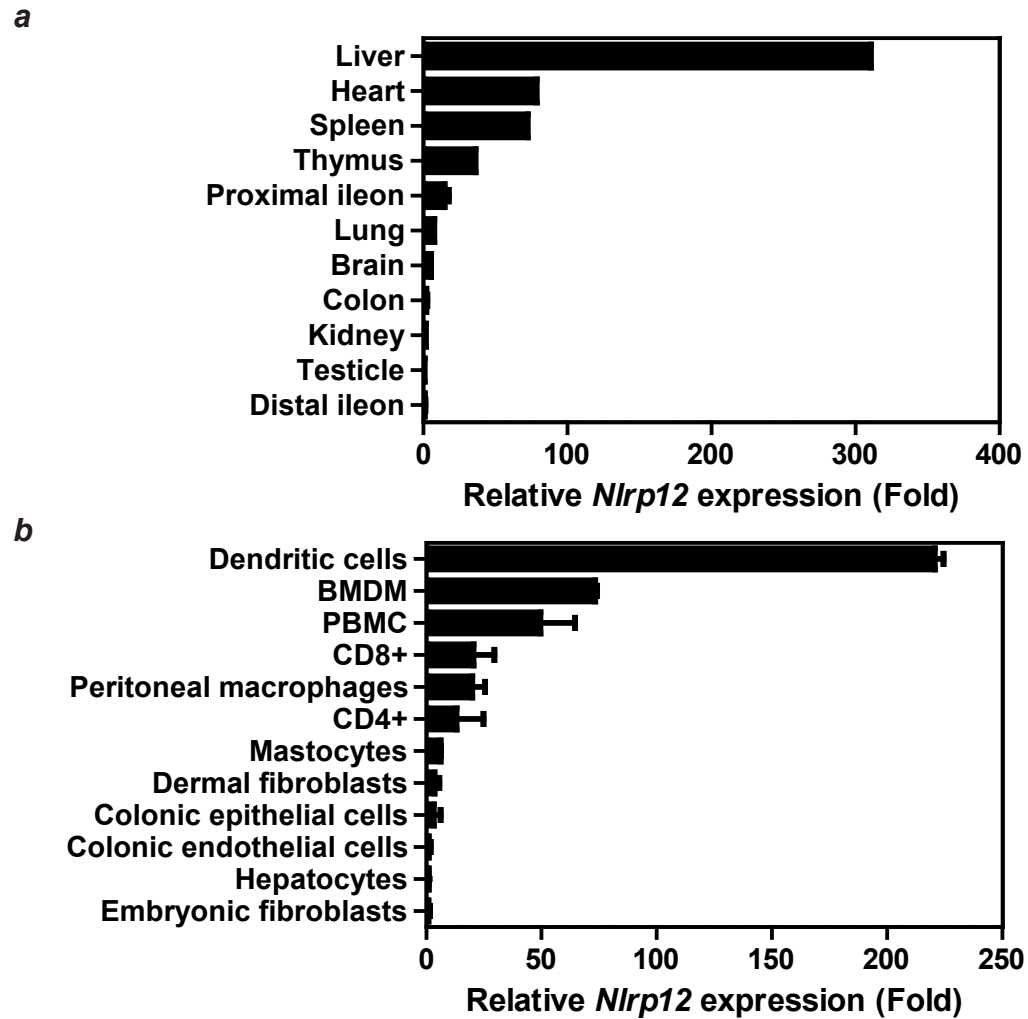

Supplementary Fig. 3. *Nlrp12* gene expression pattern in mice by qRT-PCR analysis.

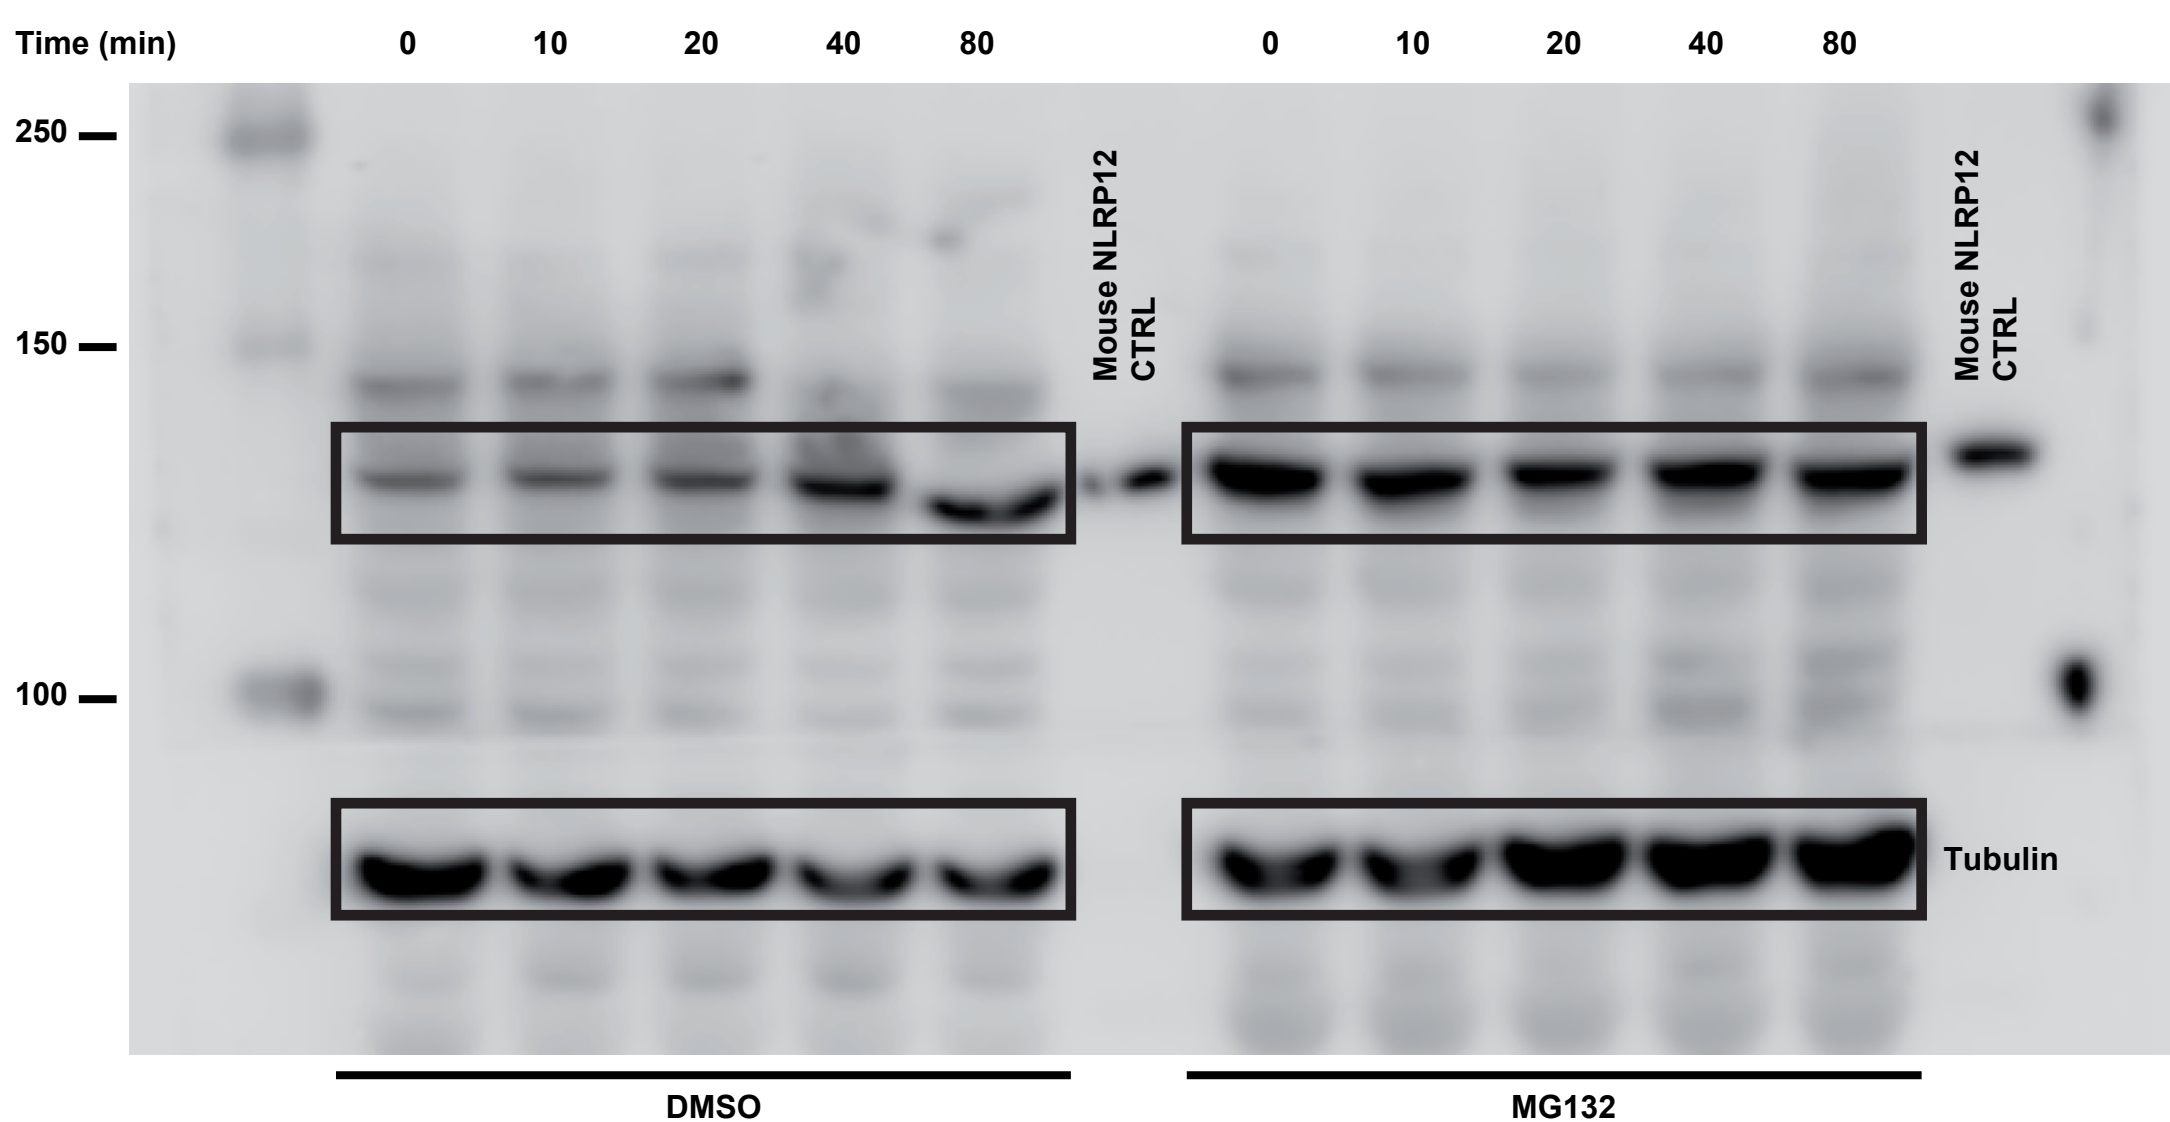

**Supplementary Fig. 4. Complete membrane from Figure 2a (top band-boxed areas).** Western blot of Co-IP protein Myc-NOD2. The protein was separated using a SDS-gel and transferred to PVDF membrane. The blot was incubated using a Monoclonal anti-pUb-K48 (Merck, Millipore, USA) (1:2500).

**a**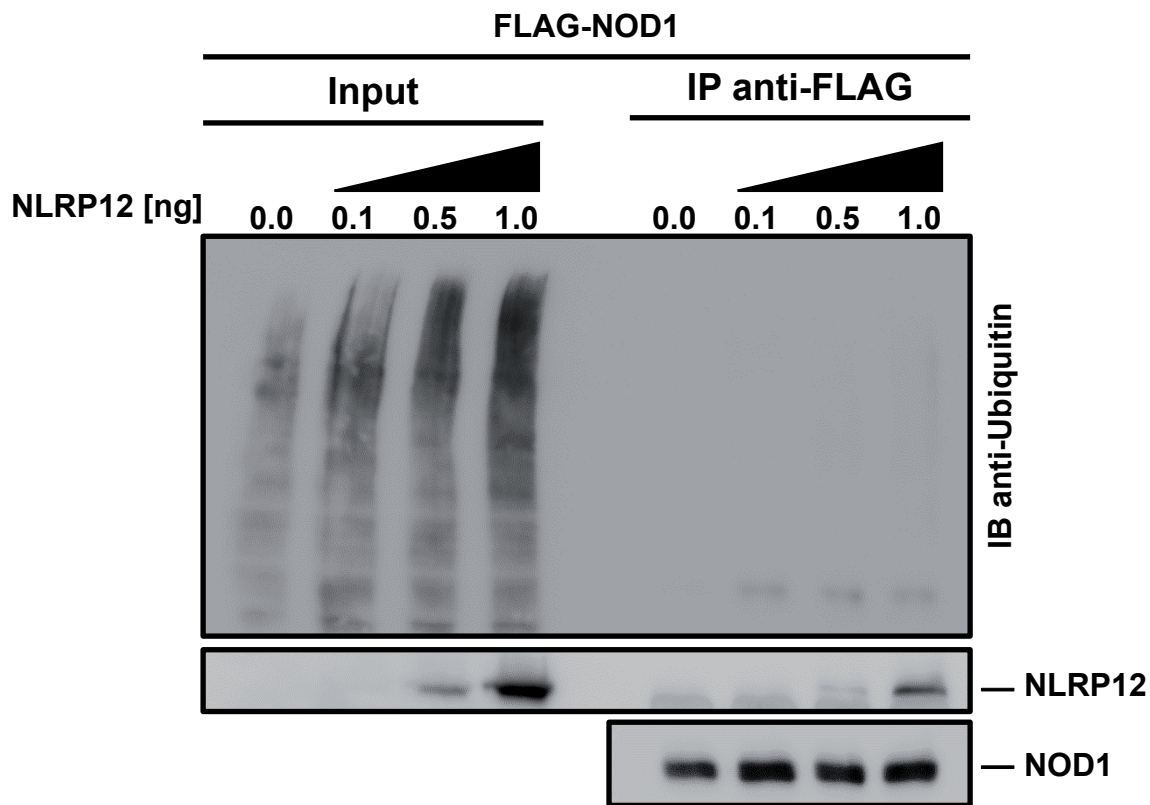**b**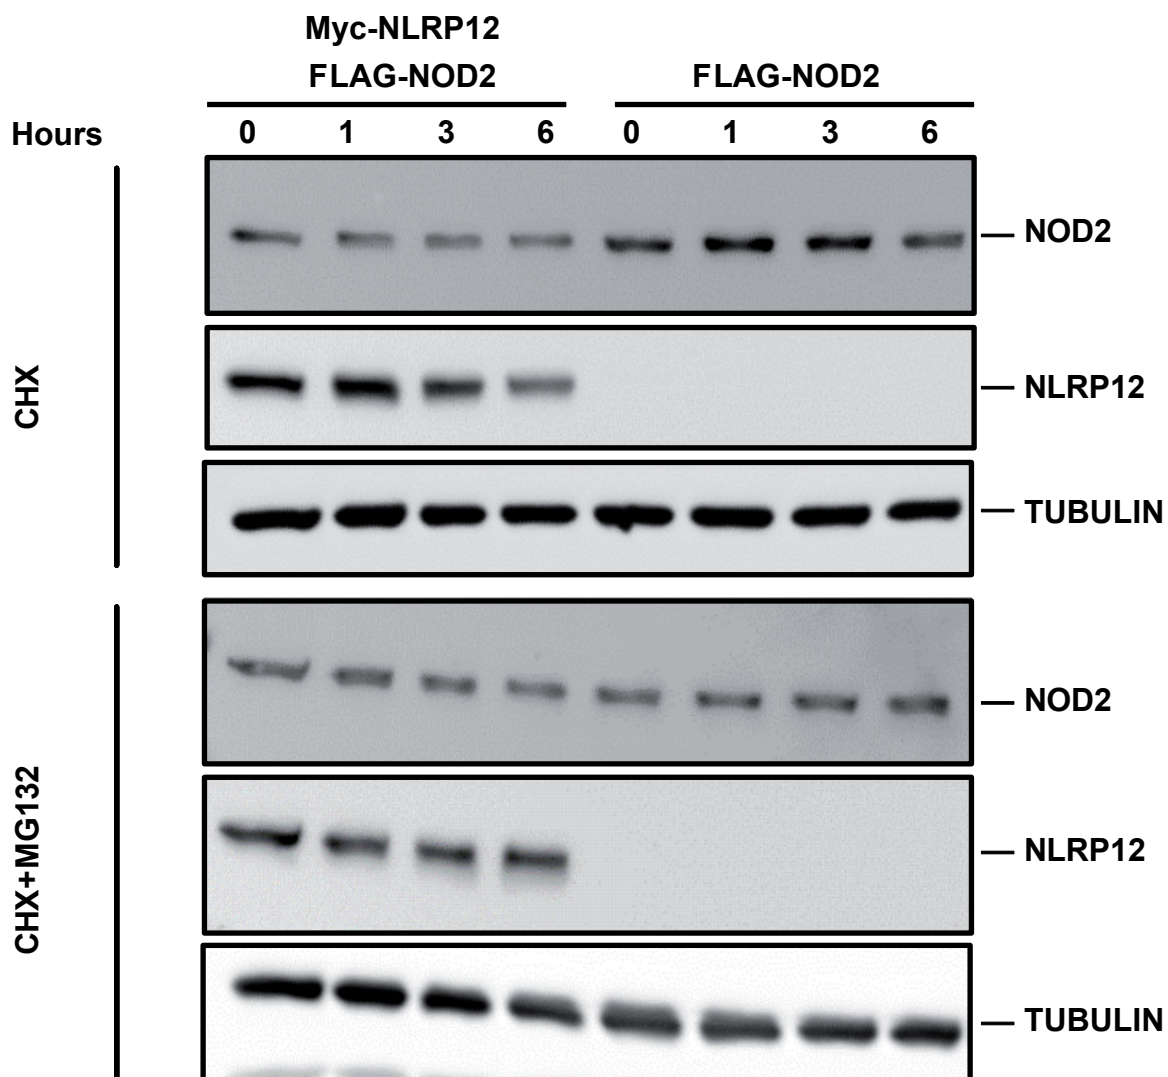

**Supplementary Fig. 5. NLRP12 does not affect the stability of NOD1 protein.** *a*) Western blot analysis of NOD1 ubiquitination in HEK293T cells that were transfected with FLAG-tagged NOD2 in the presence of increasing amounts of NLRP12. *b*) Western blot analysis of NOD2 stability in the presence of cycloheximide (CHX; 20  $\mu$ g/ml) for 4 hour and of MG132 (12.5  $\mu$ M). HEK293T Cell extracts were subjected to Western blot analysis for Flag-tagged NOD2, Myc-tagged NLRP12 and Tubulin.

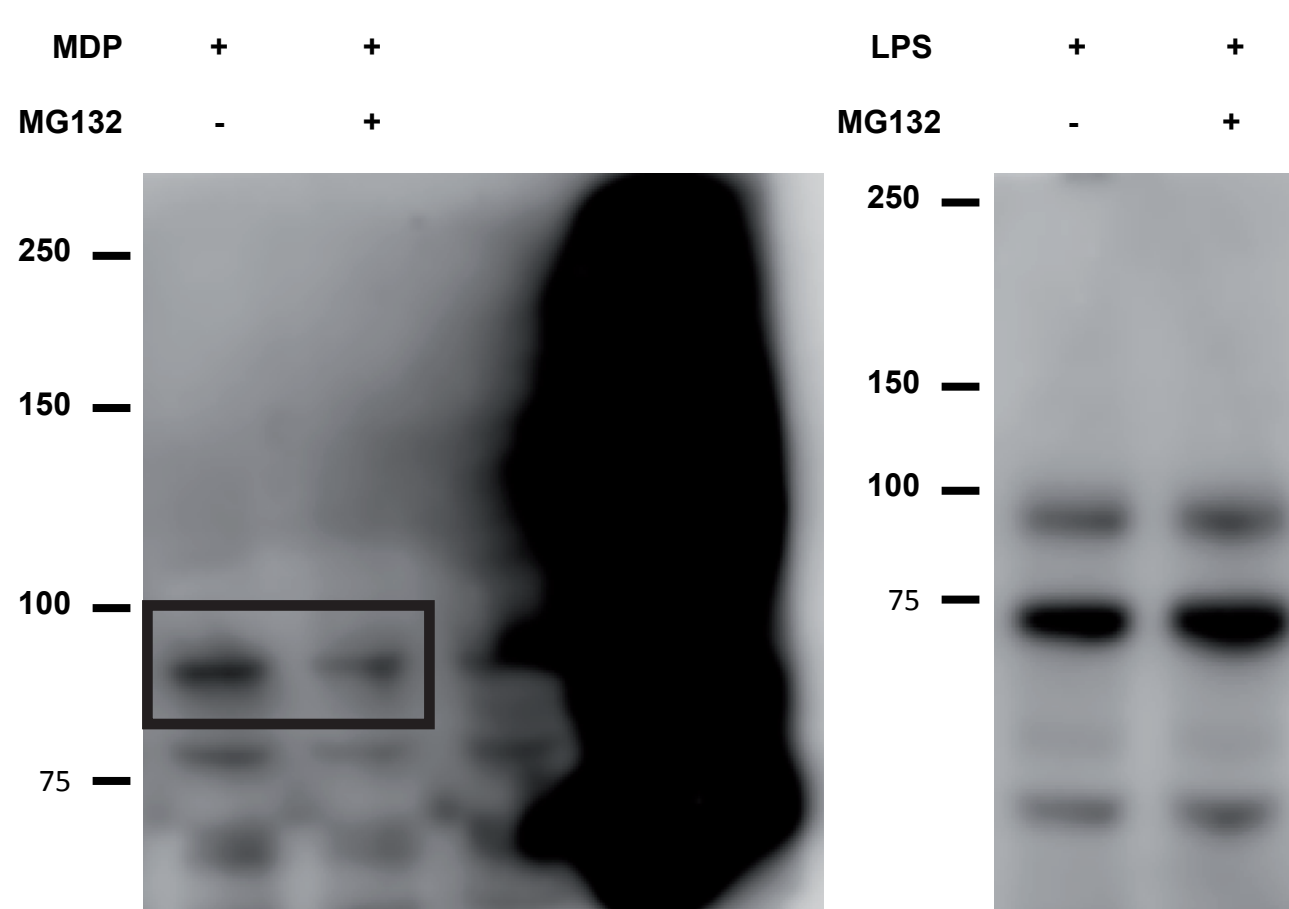

**Supplementary Fig. 6. Complete membrane from Figure 2d (boxed areas).** Western blot of Co-IP protein Myc-NOD2. The protein was separated using a SDS-gel and transferred to PVDF membrane. The blot was incubated using a monoclonal anti-HSP90alpha/beta (F8) (Santa Cruz Biotechnology Inc., USA) (1:1500).

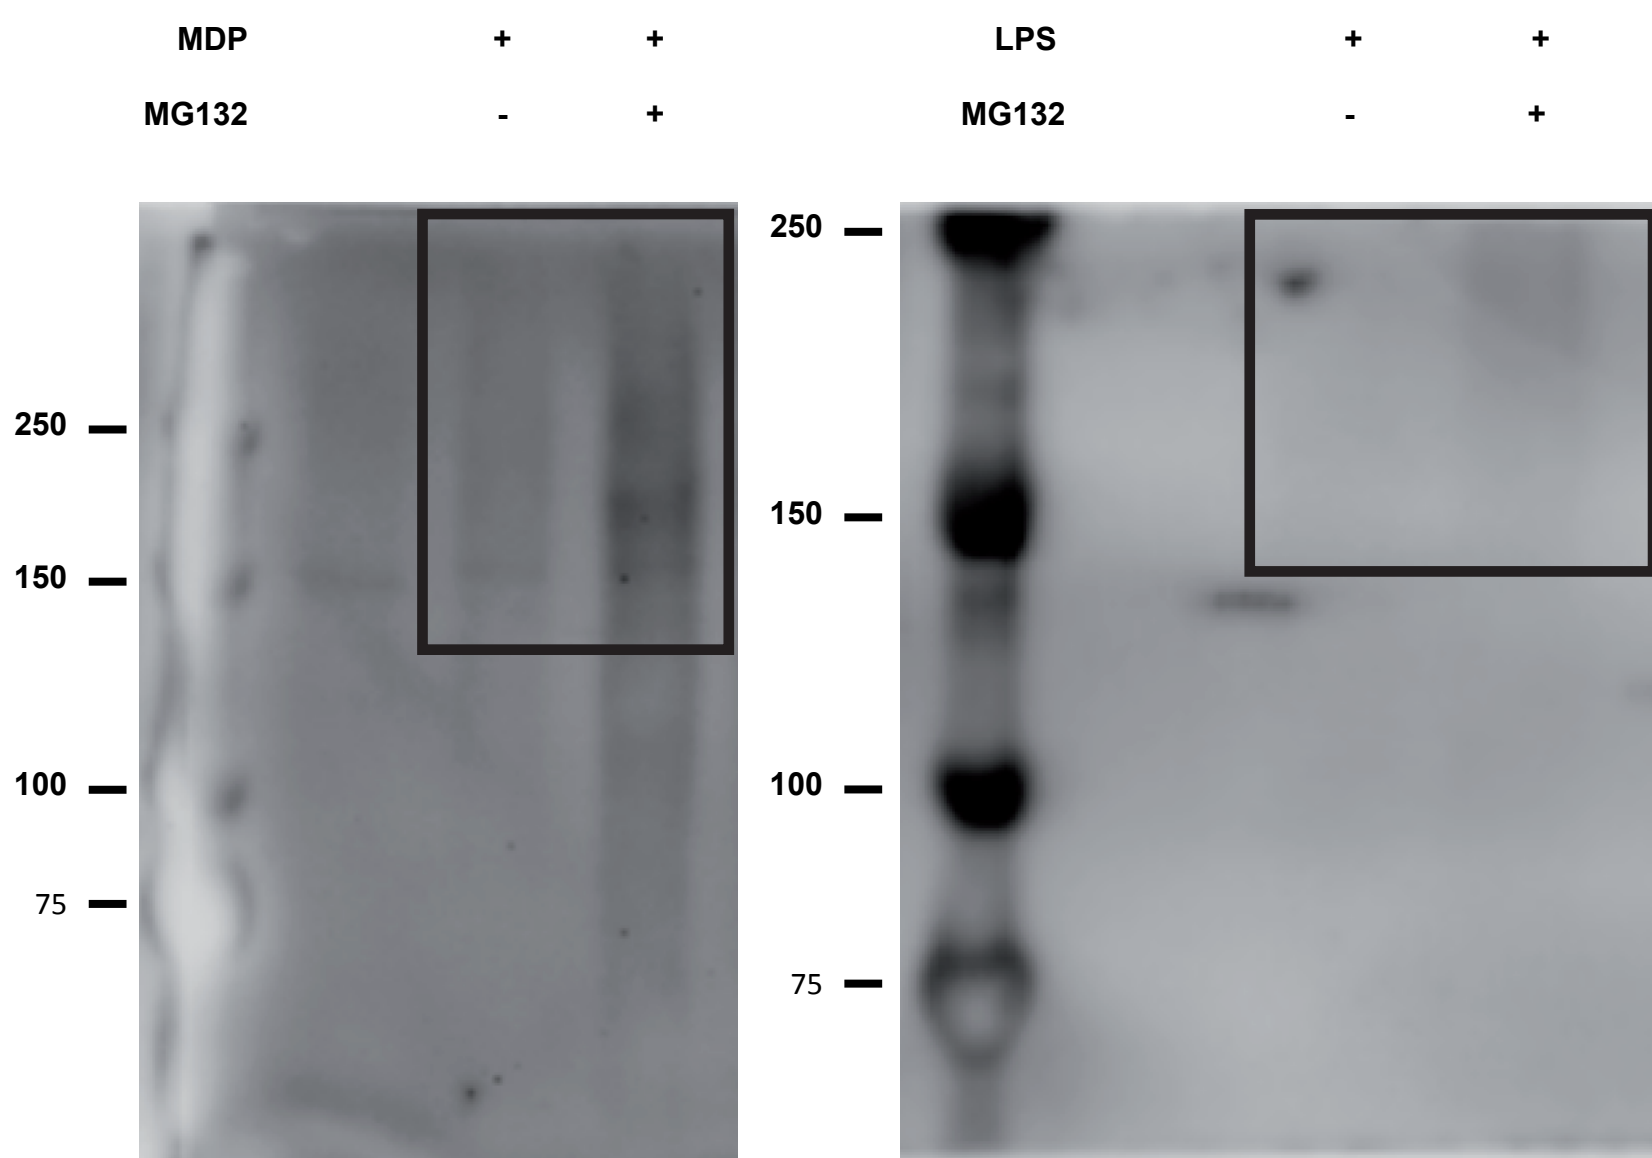

**Supplementary Fig. 7. Complete membrane from Figure 2d (boxed areas).** Western blot of Co-IP protein Myc-NOD2. The protein was separated using a SDS-gel and transferred to PVDF membrane. The blot was incubated using a Monoclonal anti-pUb-K48 (Merck, Millipore, USA) (1:2500)

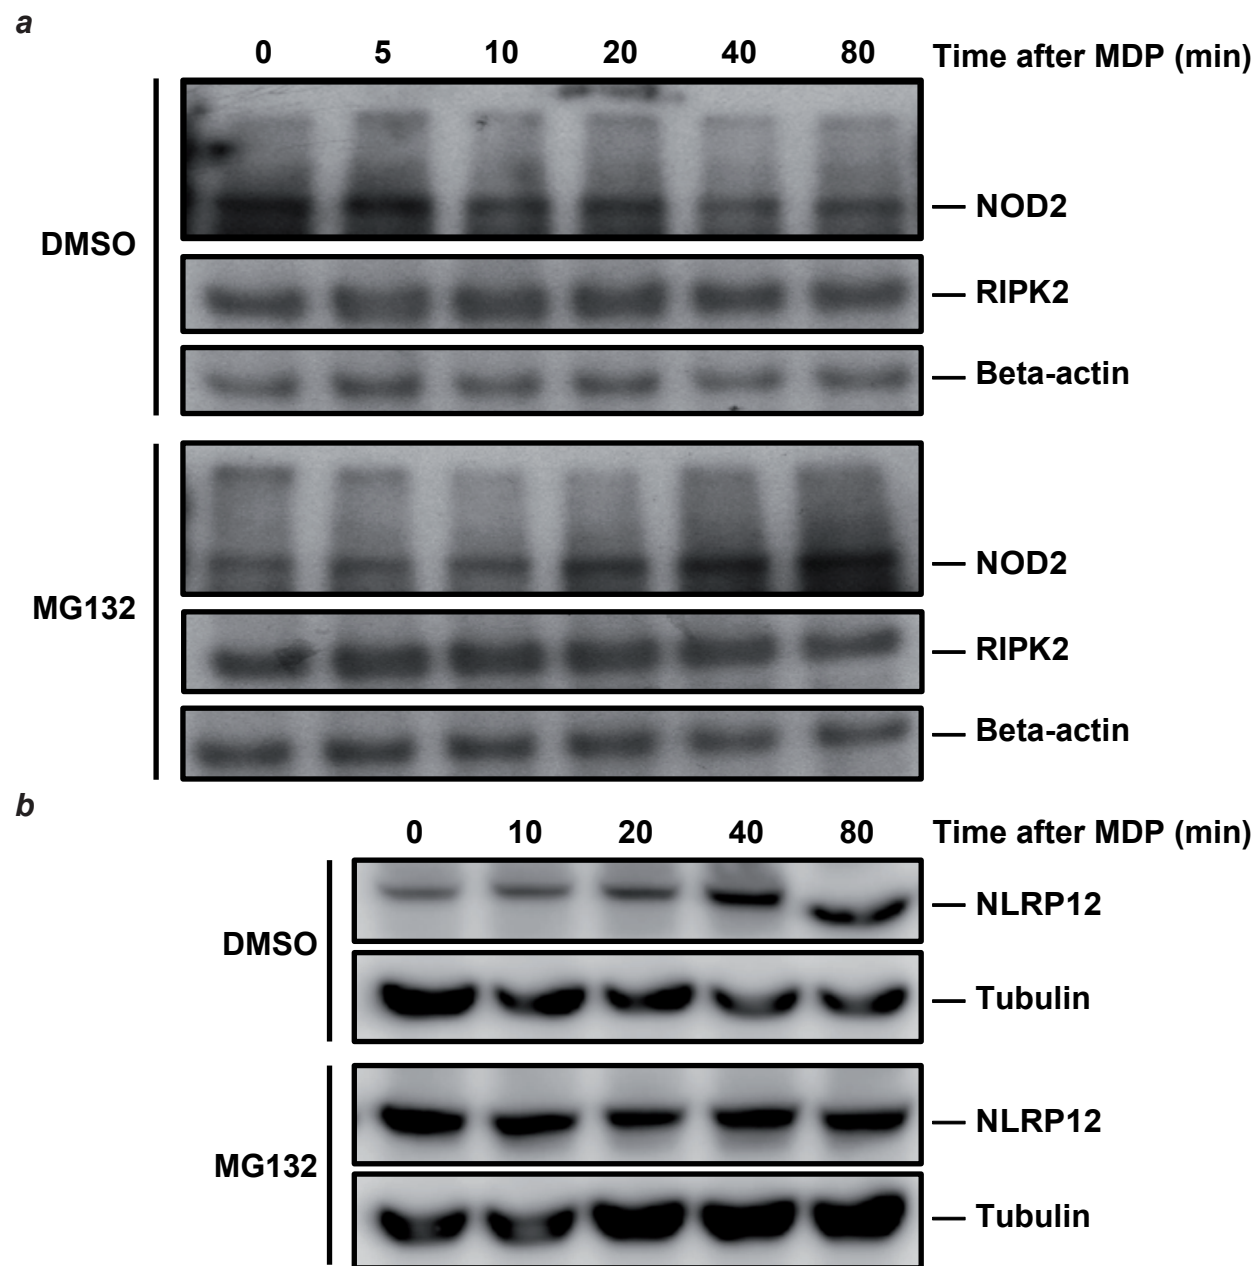

**Supplementary Fig. 8. MDP enhances NOD2 degradation and NLRP12 expression.** Cells were treated with DMSO or MG132 for 1h with DMSO or MG132. **a)** Immunoblot of extracts of THP-1 Myc-BirA\*-NOD2 cells that treated or not with MDP at 10 $\mu$ g/mL (where indicated) and reaction stopped using RIPA buffer at the indicated time. Membranes were blotted against the NOD2-monoclonal antibody and RIPK2 and Actin as a controls. **b)** Immunoblot of extracts of THP-1 cells that were treated with MDP (10 $\mu$ g/mL) or LPS (0.2  $\mu$ g/mL). Membranes were blotted against the NLRP12 antibody and Tubulin as a control.



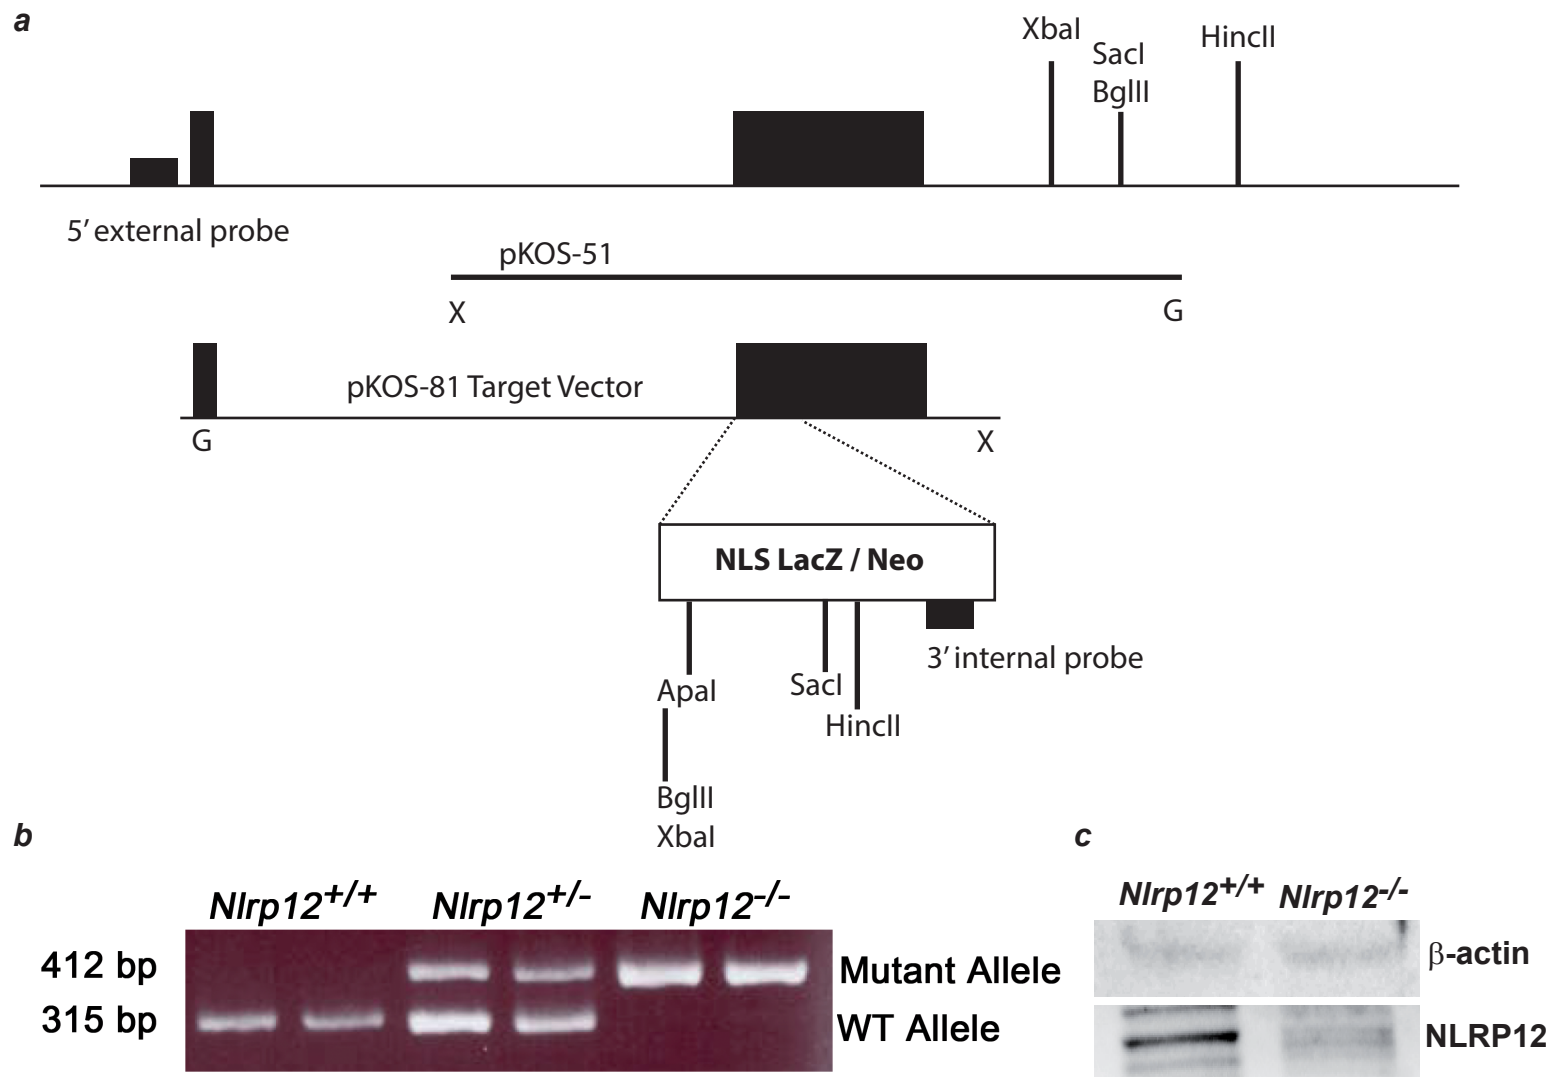

**Supplementary Fig. 9. Generation of *Nlrp12*-deficient mice.** **a)** Scheme of genetic ablation of NLRP12 expression in mice. **b)** Genotyping of *Nlrp12*-deficient mice by PCR on mouse tail genomic DNA. The bands corresponding to mutant and wild-type alleles are depicted. **c)** Western-blot analysis of NLRP12 expression in wild-type and *Nlrp12*-deficient mice.

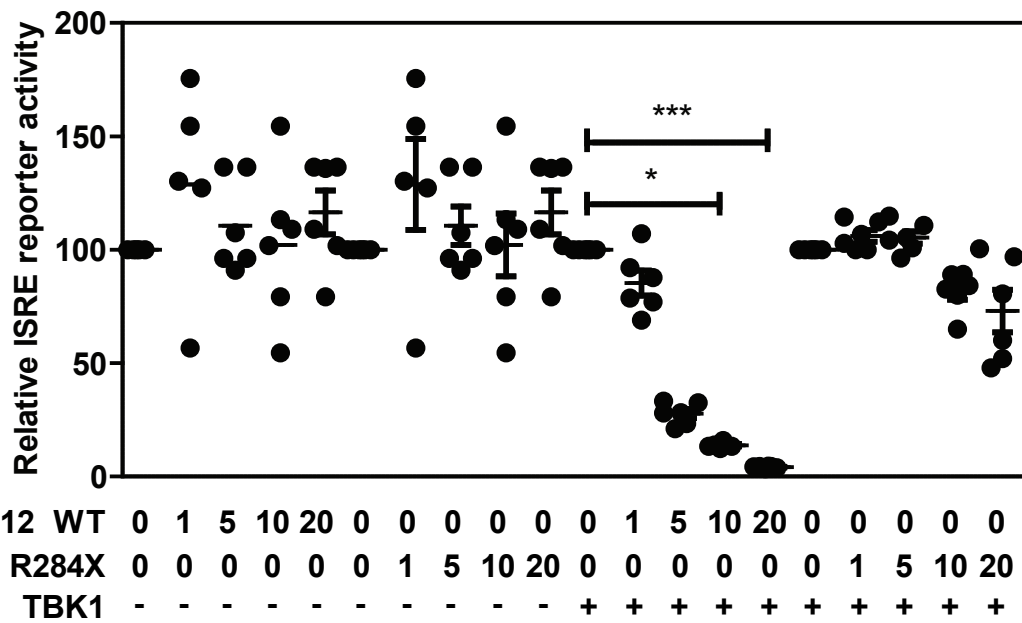

**Supplementary Fig. 10. NLRP12 Negatively Regulates Type I IFN Signaling.** ISRE-Luciferase activity in HEK-293T cells normalized to expression of  $\beta$ -galactosidase. Depicted are mean  $\pm$  SEM (n=3).

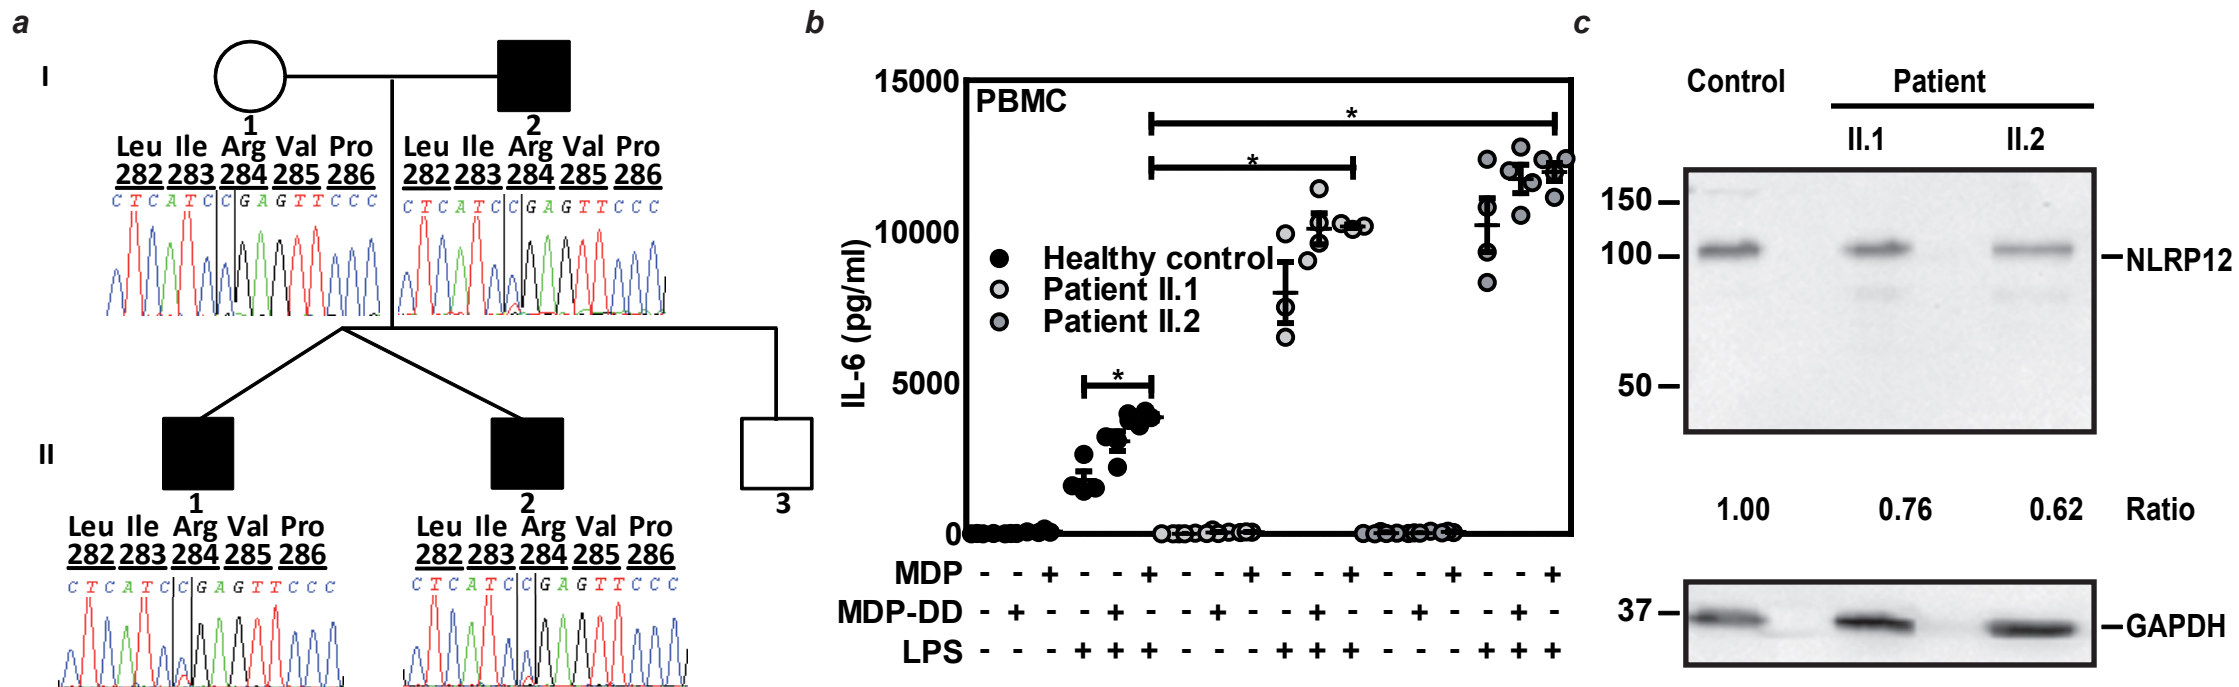

**Supplementary Fig. 11. Loss of tolerance in PBMCs of FCAS2 patients is linked to a NLRP12 haploinsufficiency as a consequence of the activation of a surveillance pathway referred to as nonsense-mediated mRNA decay.** *a*) Genealogical tree of a family with FCAS2 patients. Filled symbols represent patients with recurrent fever syndrome, and open symbols indicate unaffected family relatives. *b*) ELISA analysis of IL-6 secretion by PBMCs of healthy donors and twin patients carrying the nonsense R284X mutation in the *NLRP12* gene. *c*) Immunoblot analysis of NLRP12 expression in PBMCs of a healthy donor and both twin patients carrying the nonsense R284X mutation in the *NLRP12* gene.

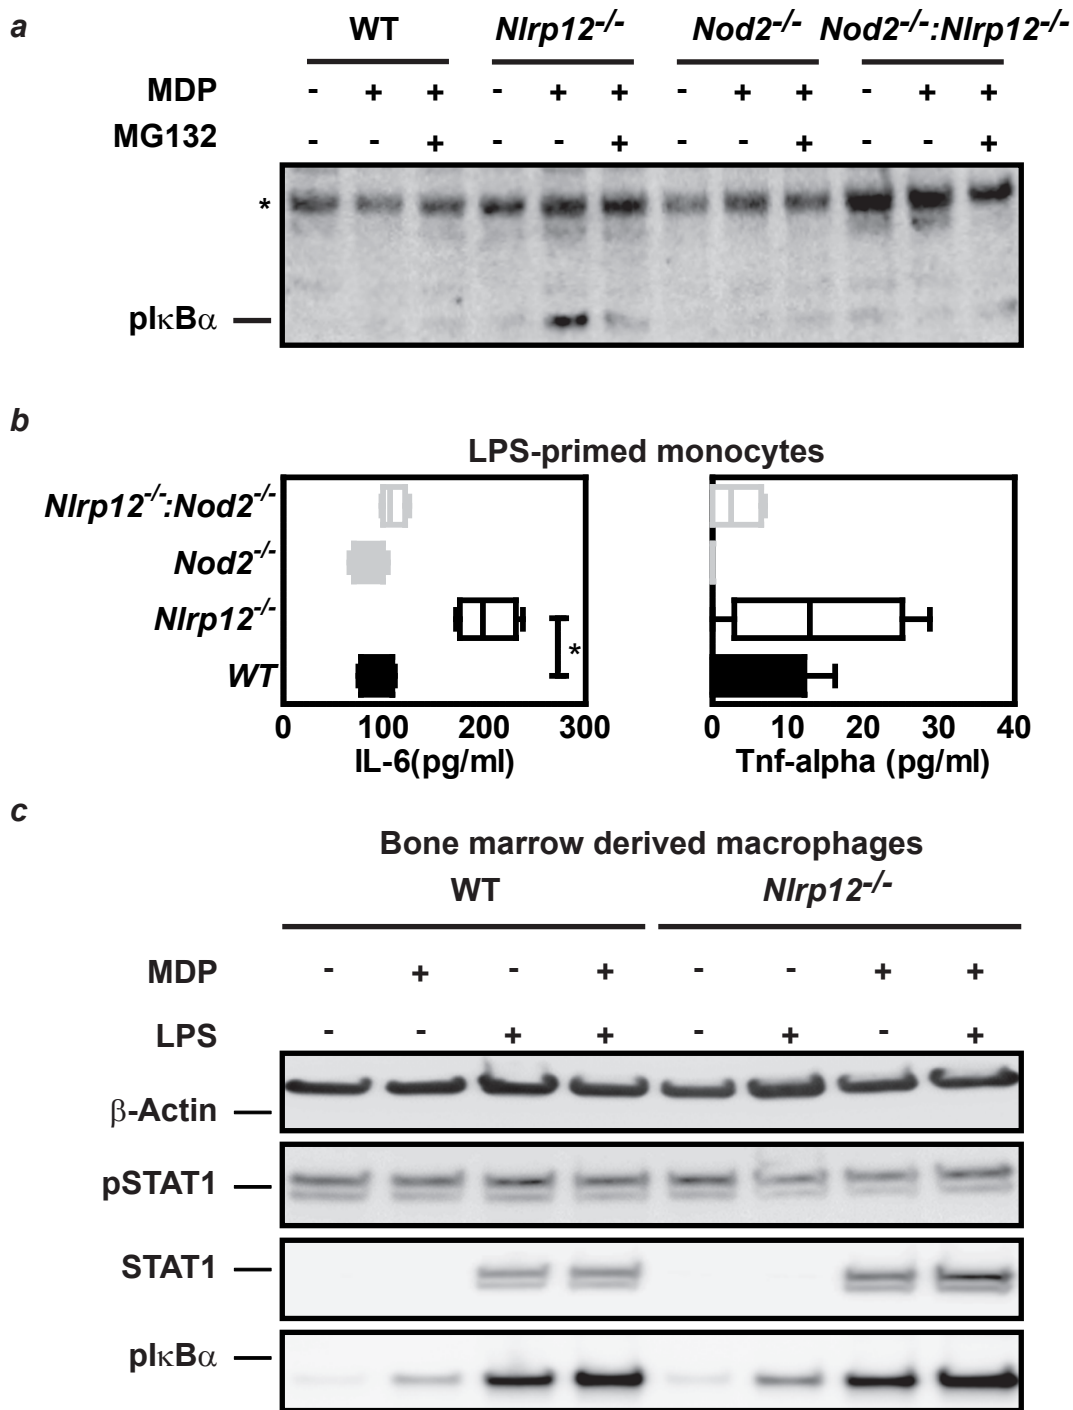

**Supplementary Fig. 12. Loss of MDP tolerance in monocytes and macrophages from the bone marrow from *Nlrp12*-deficient mice as a consequence of enhanced NOD2 signaling.** **a)** Immunoblot using anti-phospho I $\kappa$ B of extracts from monocytes that were treated by MDP and/or MG132 after being isolated from the bone marrow of mice that are deficient or not for NOD2 and/or NLRP12. The symbol \* refers to non-specific band. **b)** MDP-induced secretion of TNF-alpha and IL-6 in the supernatant from monocytes derived from the bone marrow of control mice and of those that are deficient for NLRP12 and/or NOD2. The cells were primed 4 hours with LPS before being incubated for 24 hours with MDP at 10 $\mu$ g/mL. All experiments were performed in quadruplicate. **c)** Immunoblot using anti-phospho I $\kappa$ B, anti-phospho STAT1 of extracts from differentiated macrophages that were treated by MDP and/or LPS.

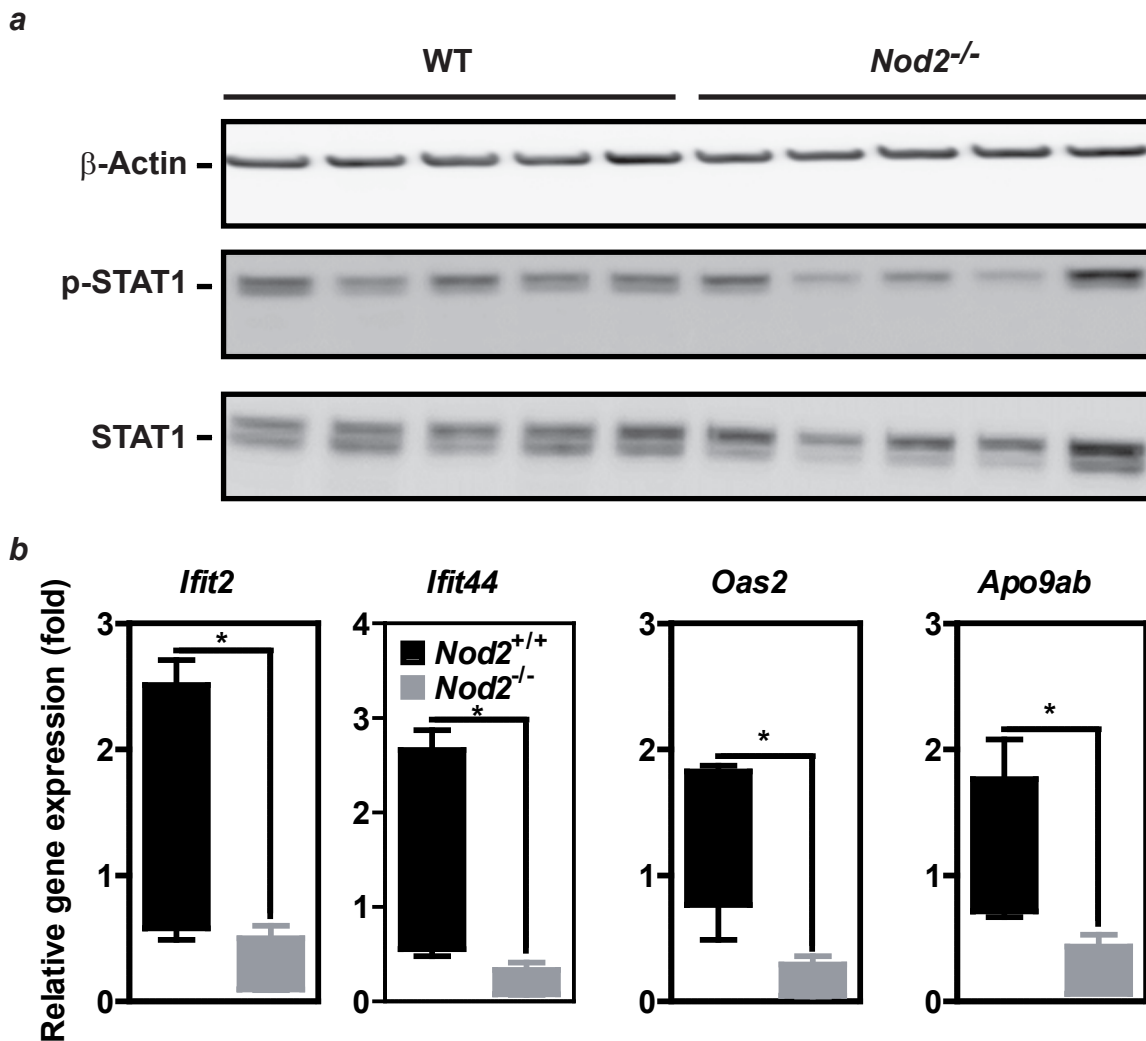

**Supplementary Fig. 13. Loss of NOD2 impairs STAT3 activation and expression of STAT1-target genes in response to *Citrobacter rodentium*.** **a)** Western blot analysis of STAT1 phosphorylation was performed by using total tissue samples from proximal colon of *Nod2*<sup>-/-</sup> mice and wild-type controls.  $\beta$ -Actin was used as loading control. **b)** Relative gene expression of *Ifit2*, *Ifit44*, *Oas2* and *Apo9ab* was analyzed at the proximal colon of *Nod2*<sup>-/-</sup> mice (n = 4) and controls (n = 5). Statistical significance was calculated by non-parametric Mann-Whitney test. \* P < 0.05 and \*\* P < 0.01.

**a**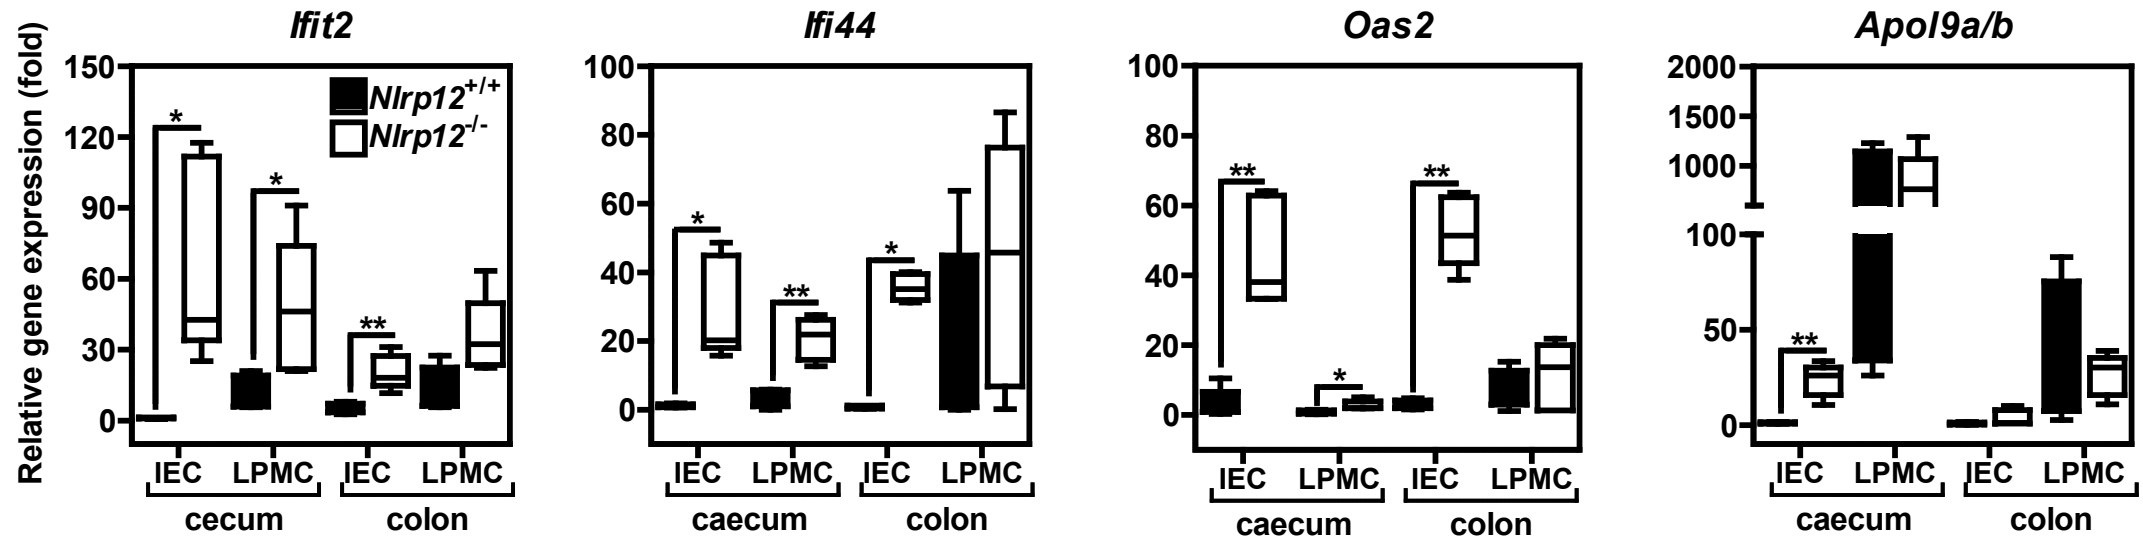**b**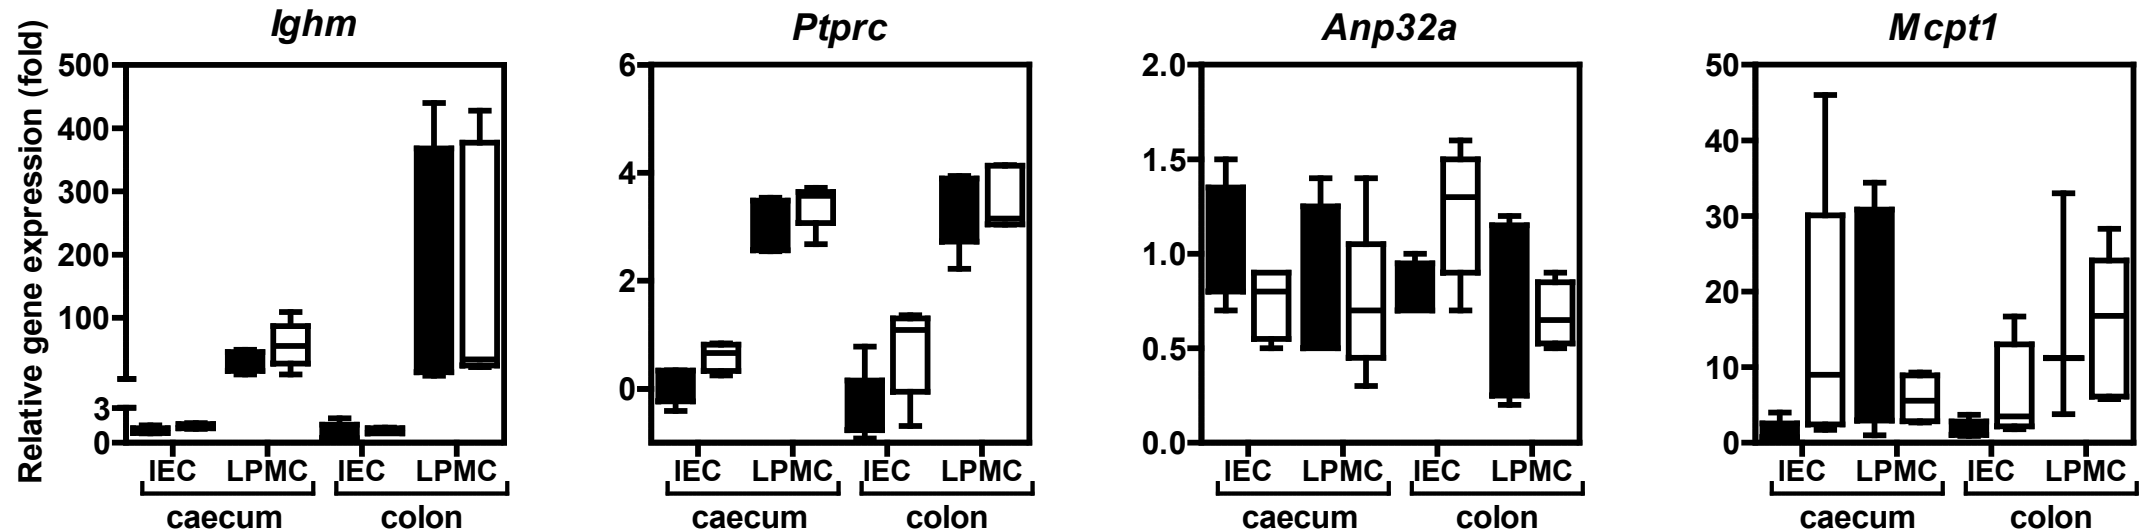

**Supplementary Fig. 14. NLRP12 is dispensable for *Ighm*, *Ptpcr*, *Anp32a* and *Mcpt1* expression in the mouse caecum and colon, while negatively regulating the expression of several ISGs. a)** Relative gene expression of *Ifit2*, *Ifi44*, *Oas2* and *Apo19ab* was analyzed by qRT-PCR using IEC and LPMC isolates (n = 5) of caecum and proximal colon from *Nlrp12*<sup>-/-</sup> mice and wild-type controls. **b)** Relative gene expression of *Ighm*, *Ptpcr*, *Anp32a*, and *Mcpt1* was analyzed by using IEC and LPMC isolates (n = 5) of caecum and colon from *Nlrp12*<sup>-/-</sup> and wild-type mice. Statistical significance was calculated by non-parametric Mann-Whitney test.

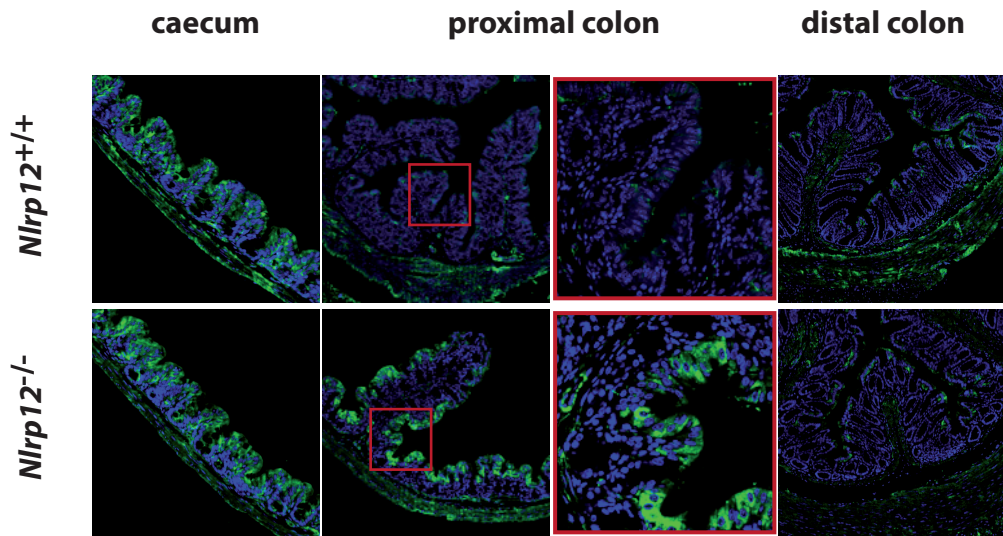

**Supplementary Fig. 15. Loss of NLRP12 triggers OAS2 expression within the colonic epithelium.** Immunohistochemistry for OAS2 was performed on 5  $\mu$ m-thick tissue sections from caecum, proximal and distal colon of naïve wild-type and *Nlrp12*<sup>-/-</sup> mice. Scale bars represent 50 $\mu$ m (caecum), 200 $\mu$ m (proximal colon) and 100 $\mu$ m (distal colon).

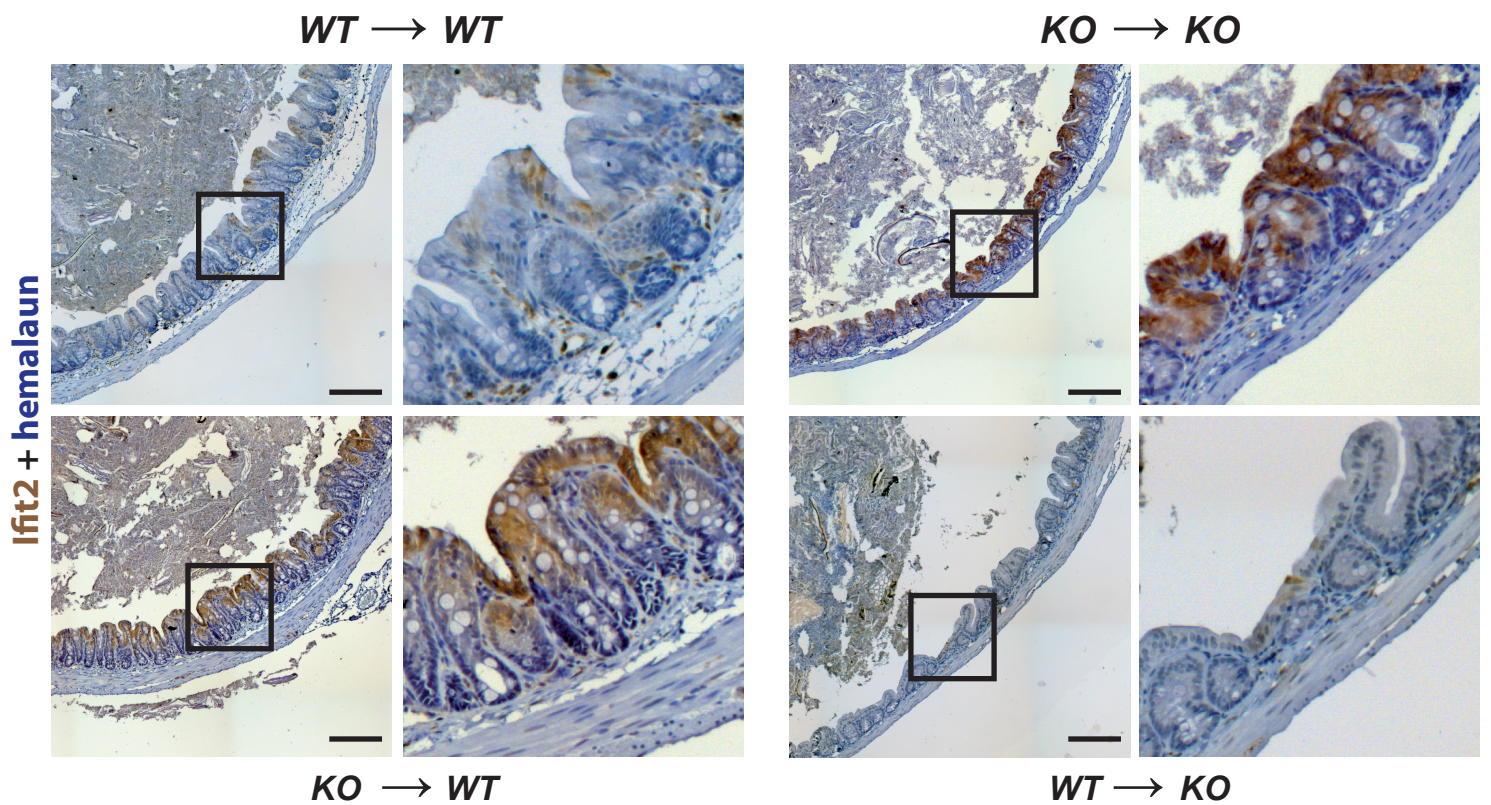

**Supplementary Fig. 16. Loss of NLRP12 in leukocytes results in accumulation of inflammatory monocytes that triggers ISG induction within the colonic epithelium.** IFIT2 protein expression was analyzed by immunohistochemistry on tissue sections prepared from caecum of wild-type chimeric mice (WT→WT), *Nlrp12*-deficient recipients that were reconstituted with hematopoietic cells from mutant mice (*Nlrp12*<sup>-/-</sup>→*Nlrp12*<sup>-/-</sup>), wild-type recipients that were reconstituted with hematopoietic cells from *Nlrp12*-deficient mice (*NNlrp12*<sup>-/-</sup>→WT), and knock-out mice that were reconstituted with hematopoietic cells from *Nlrp12*-deficient mice (WT→*Nlrp12*<sup>-/-</sup>). Scale bars represent 200µm.



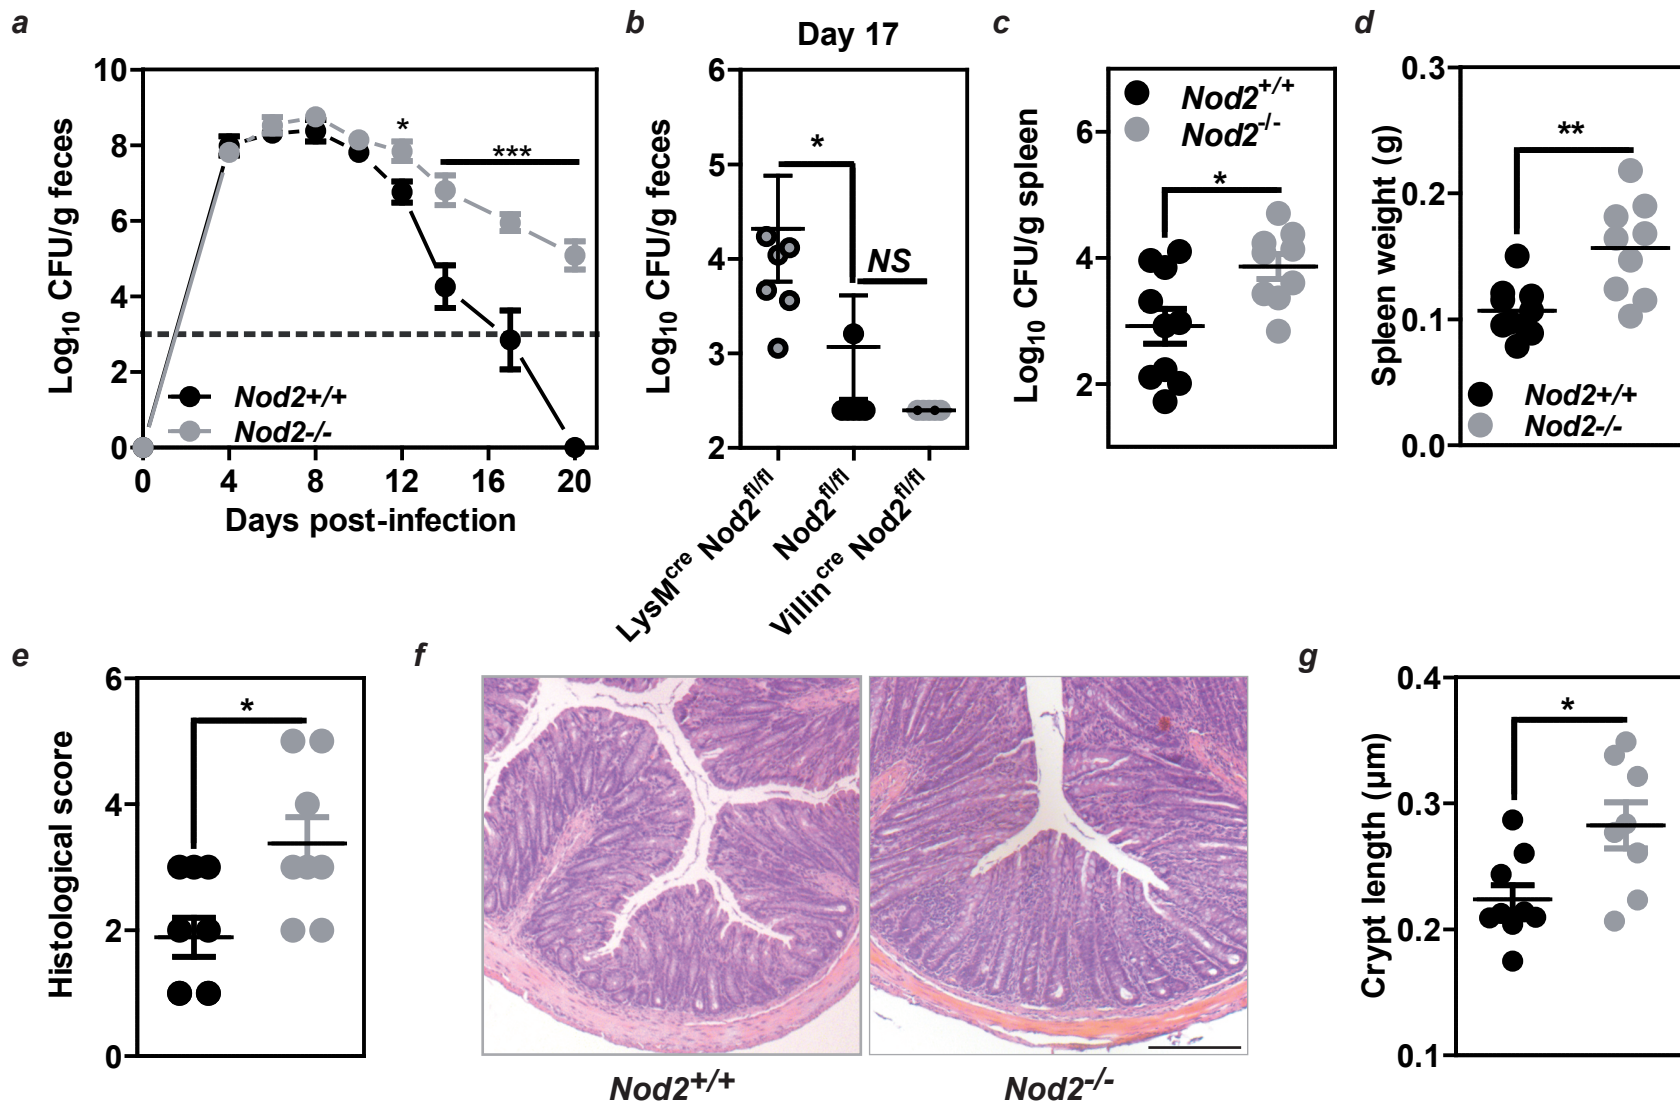

**Supplementary Fig. 17. Loss of NOD2 in mononuclear cells impairs colonization resistance towards *Citrobacter rodentium*.** **a)** Whole infection course in control and *Nod2*-deficient mice was monitored by quantifying colony-forming units (CFU) per gram feces. Detection limit of CFU assay is indicated by the dotted line. **b)** *C. rodentium* burden in faeces from either *LysM<sup>cre</sup>;Nod2<sup>fl/fl</sup>* (n=8), *Villin<sup>cre</sup>;Nod2<sup>fl/fl</sup>* (n=5) or *Nod2<sup>fl/fl</sup>* (n=8) mice at day 17 post-infection. Data represent mean ± SEM. **c) to g)** Susceptibility to *C. rodentium* infection in *Nod2*-deficient mice was assessed on day 20 post infection by quantifying **c)** CFU from spleens, **d)** spleen weights and **e)** histological scores. **f)** Representative H&E staining of 5 µm-thick tissue sections from distal colon and **g)** crypt lengths from distal colon.

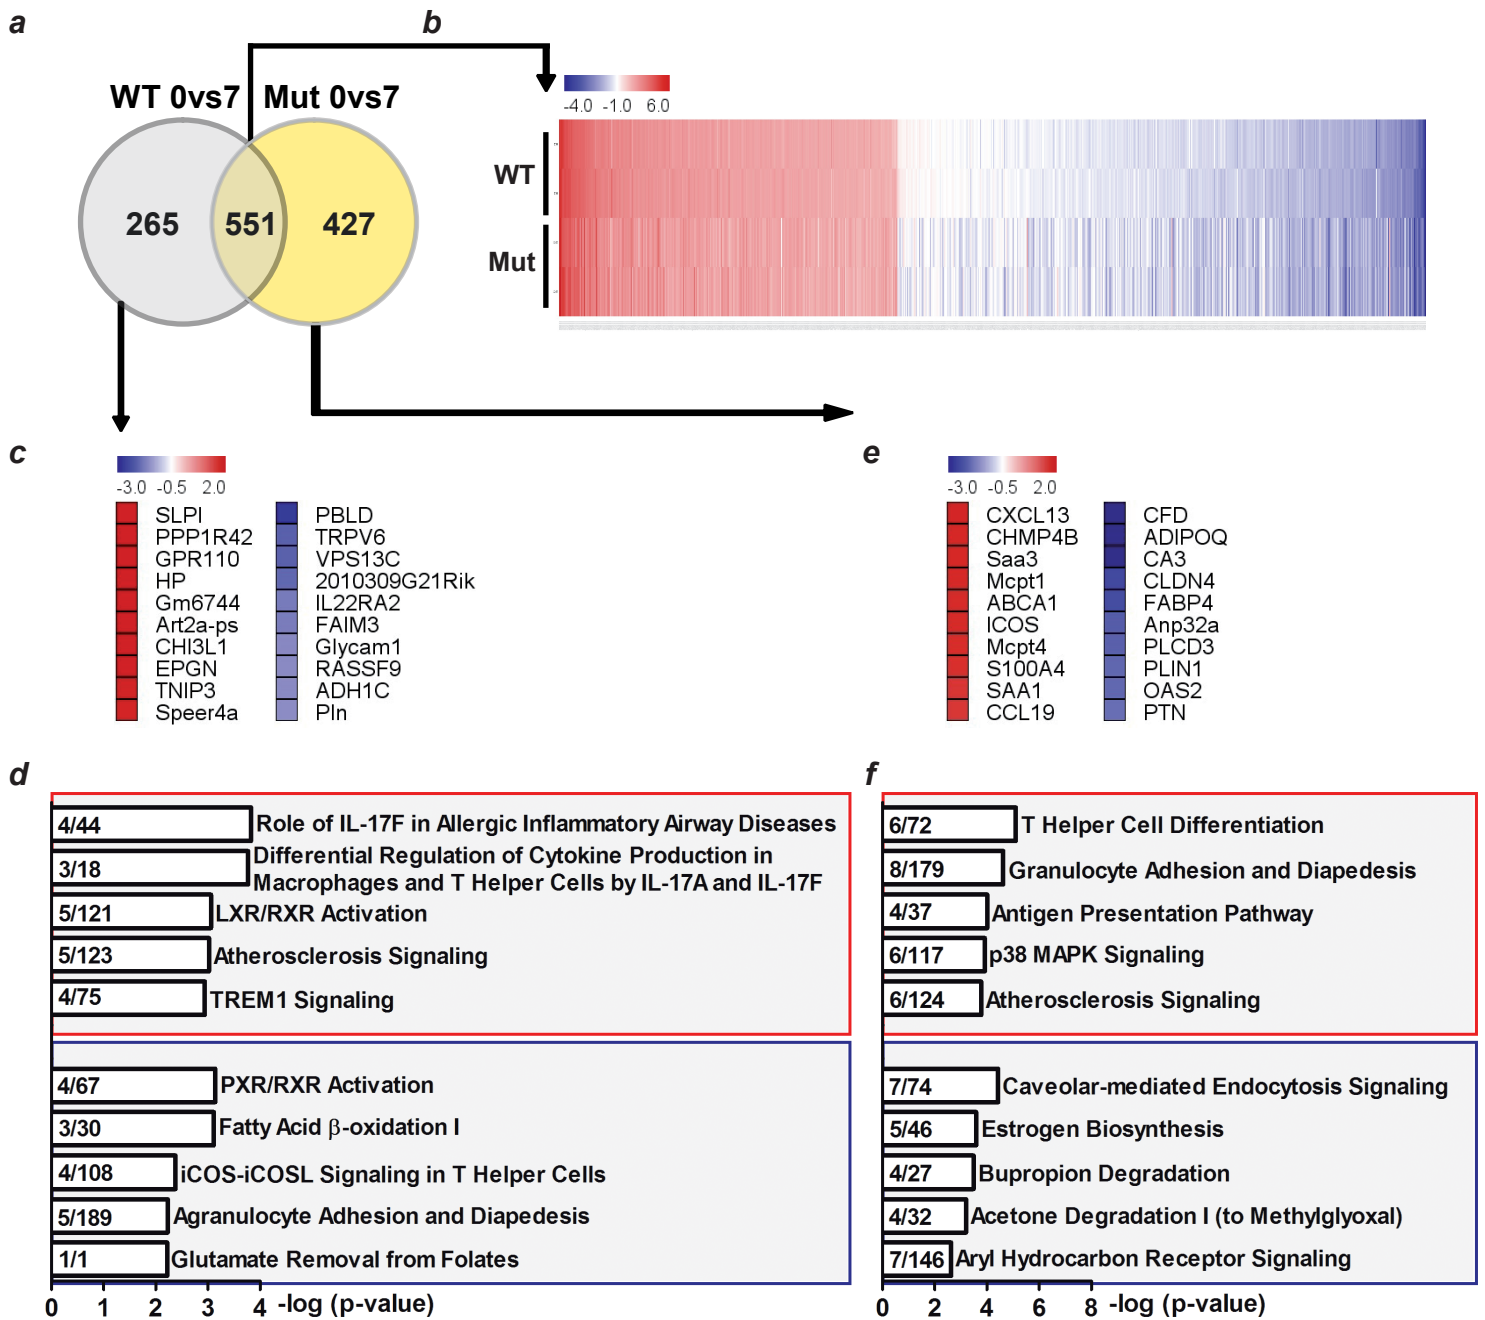

**Supplementary Fig. 18. *Citrobacter rodentium* induces a distinct transcriptional response in *Nlrp12*-deficient mice.** **a)** Venn diagram analysis of differentially expressed genes between infected *lrp12*<sup>-/-</sup> and wild-type mice at day 7 post infection. **b)** Heat map illustration of log<sub>2</sub>-based changes in the intersection subset of genotype-independent gene regulation upon 7 days *C. rodentium* infection. Top 10 up- and down-regulated genes are shown together with significantly enriched pathways for **c)**, **d)** wild-type mice and **e)**, **f)** *Nlrp12*<sup>-/-</sup> mice on day 7 post-infection. Pathways framed in red are significantly enriched by up-regulated gene subsets, while those in blue are significantly enriched by down-regulated gene subsets.

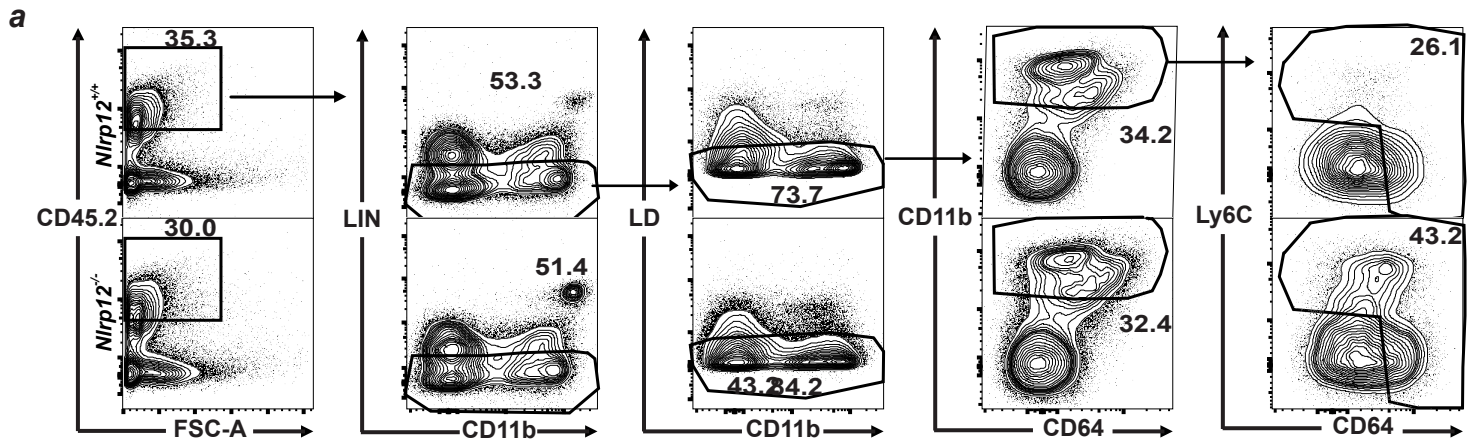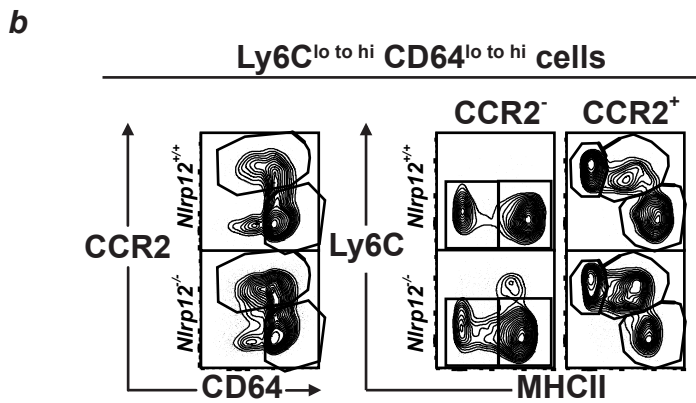

**Supplementary Fig. 19. Gating strategy of the cytofluorometry analysis of cell suspensions from the colonic *lamina propria* of infected wild-type and *Nlrp12*-deficient mice. **a)** Gating strategy of the cytofluorometry analysis represented in panel **b)**. **b)** Representative expression of Ly6C and MHCII expression amongst total live fraction of CCR2 and/or CD64-expressing colonic CD11b<sup>+</sup> cells from *Nlrp12*<sup>-/-</sup> and wild-type mice.**

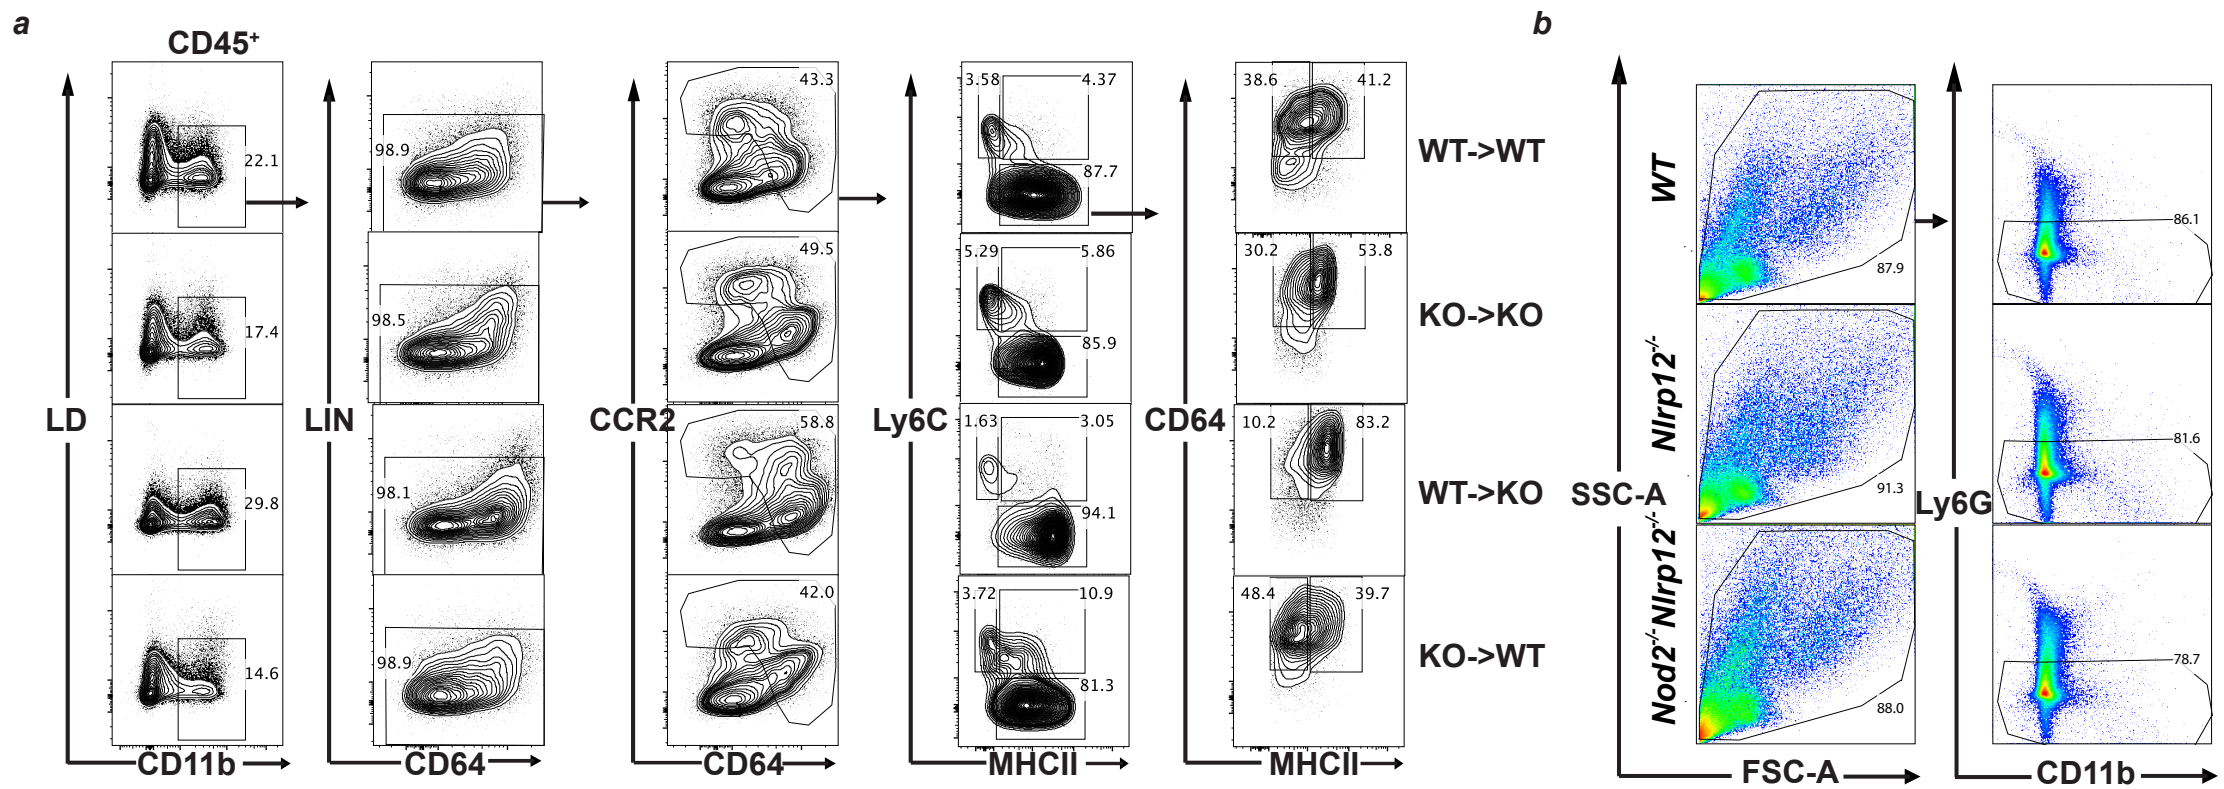

**Supplementary Fig. 20. Gating strategy of the cytofluorometry analysis.** Cell suspensions from the colonic lamina propria used for panel h of Figure 5 (a), and panel k of Figure 6 (b).

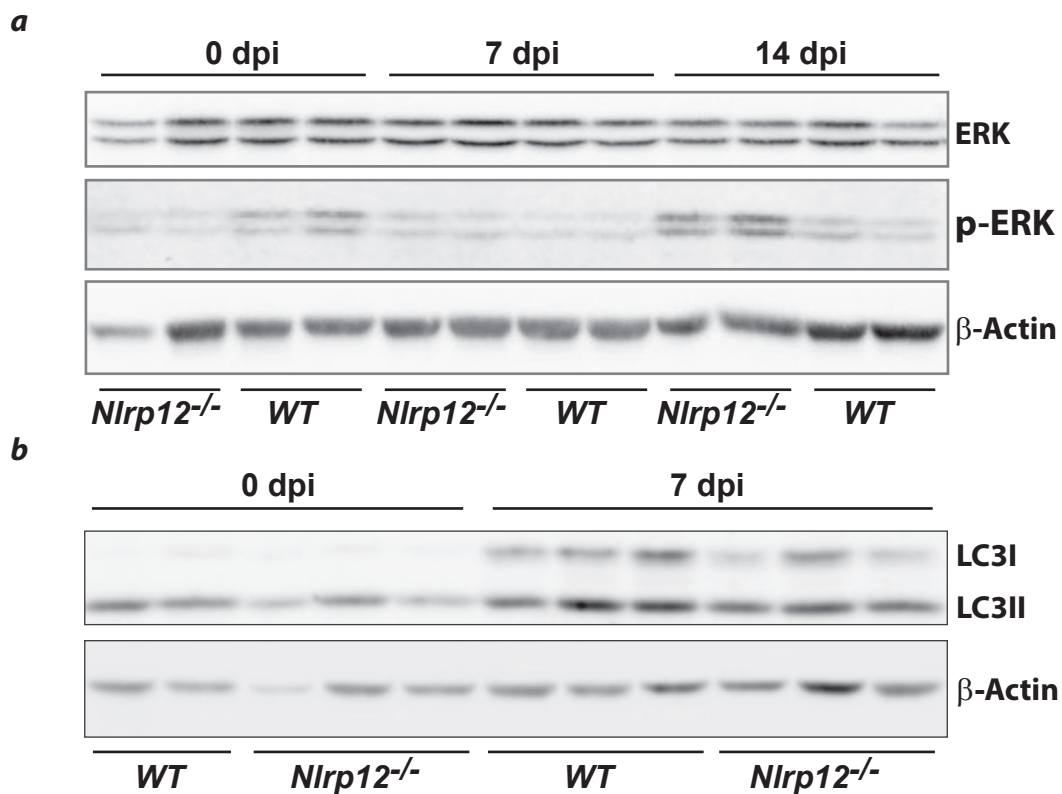

**Supplementary Fig. 21. Activation of ERK pathway and lipidation of LC3 in the colon of infected mice.** Western blot analysis was performed by using samples from distal colon of *Nlrp12*<sup>-/-</sup> and control mice on day 0, day 7, and day 14 post *C. rodentium* infection, respectively. **(a)** Activation of ERK pathway was analysed by using antibodies against ERK and p-ERK, respectively. **(b)** Activation of autophagy was analysed by using anti-LC3 antibody.  $\beta$ -Actin was used as loading control.

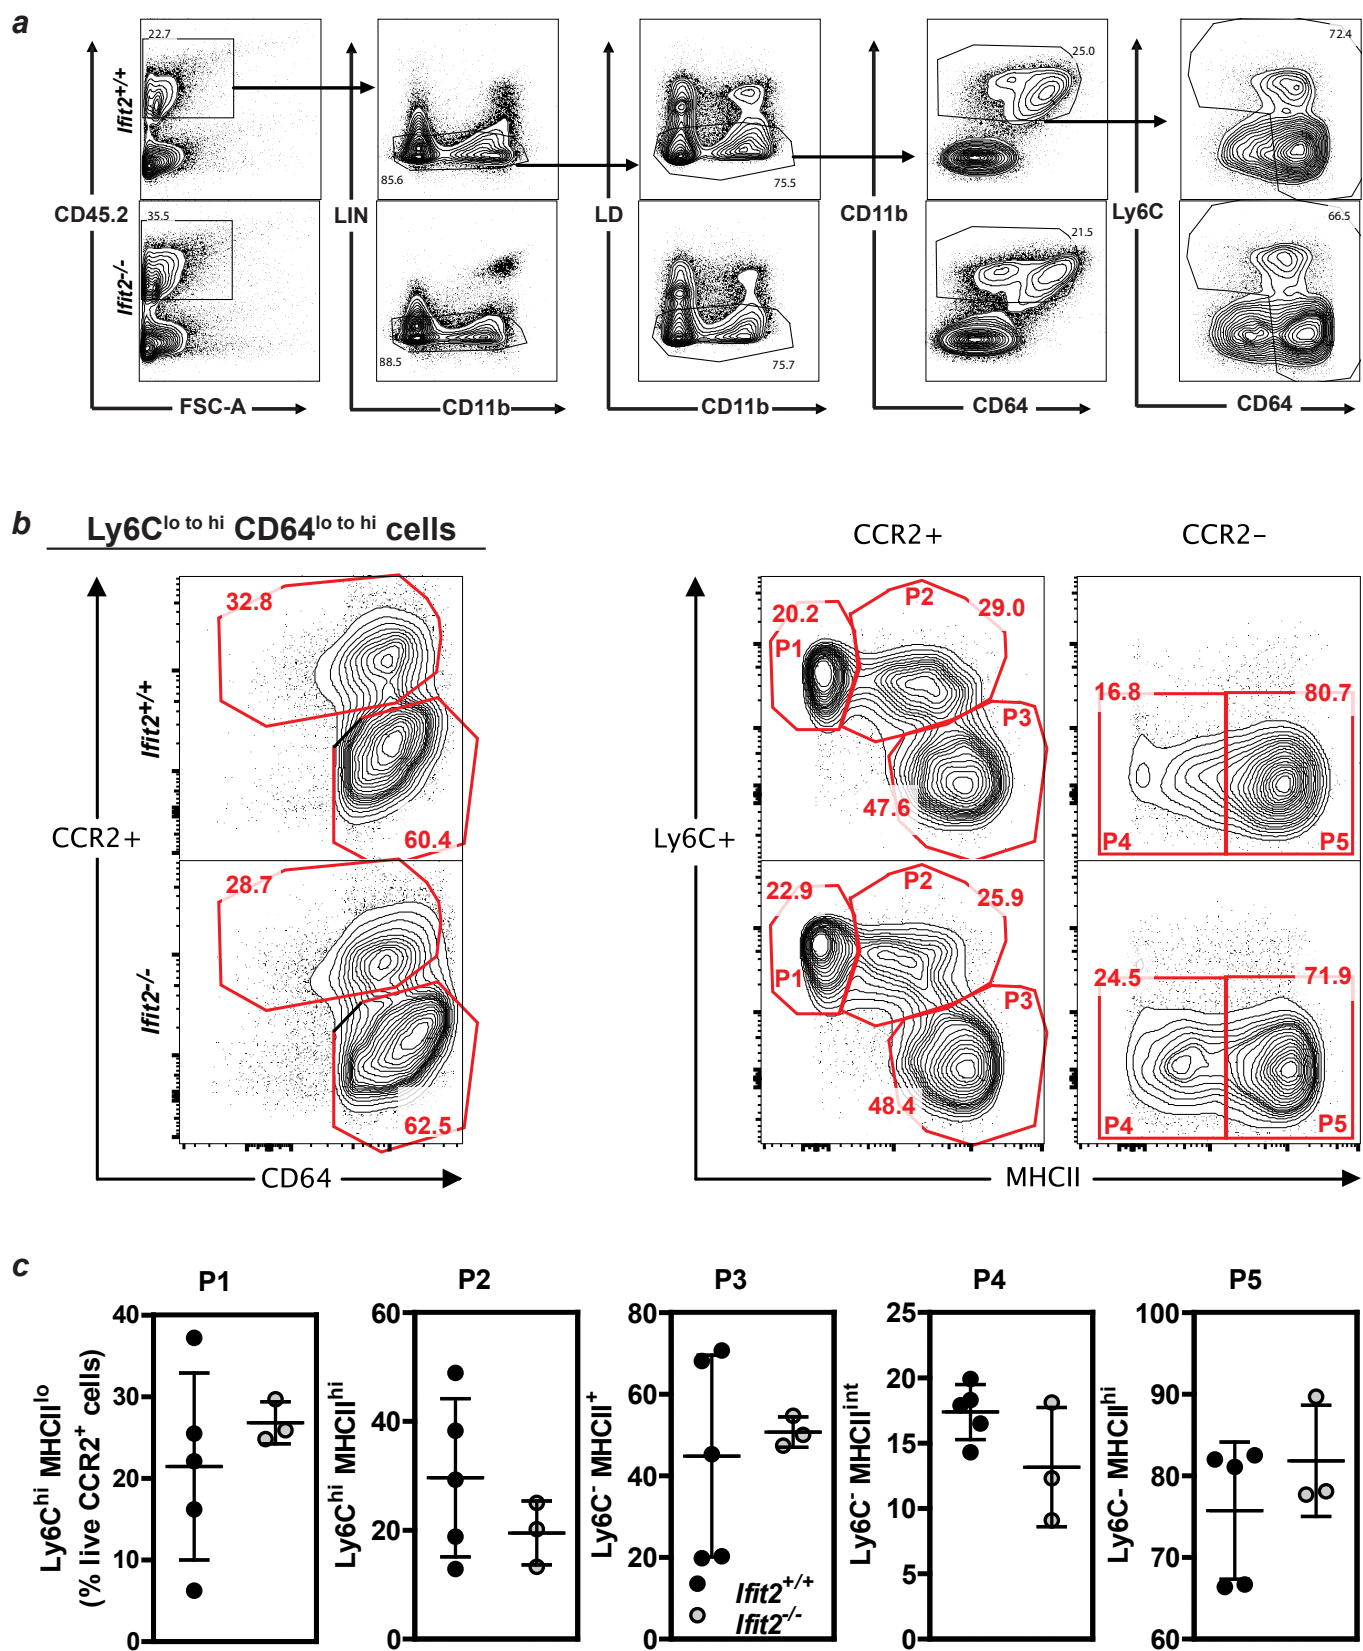

**Supplementary Fig. 22. Monocyte-waterfall shaped distribution within the colon lamina propria of *Ifit2*-deficient mice in response to *Citrobacter rodentium*.** **a)** Gating strategy of the cytofluorometry analysis. **b)** Representative expression of Ly6C and MHCII expression amongst total live fraction of CCR2 and/or CD64-expressing colonic CD11b<sup>+</sup> cells from *Ifit2*<sup>-/-</sup> and wild-type mice. **c)** Mean proportion of Ly6C<sup>hi</sup>MHCII<sup>lo</sup>, Ly6C<sup>hi</sup>MHCII<sup>+</sup> and Ly6C<sup>-</sup>MHCII<sup>+</sup> subsets as a percentage of live CCR2-expressing colonic CD11b<sup>+</sup> cells from the lamina propria of wild-type and mutant mice. Statistical significance was assessed by non-parametric Mann-Whitney test.
